# Supplementary material for: Effect of axial molecules and linker length on CO2 adsorption and selectivity of CAU-8: a combined DFT and GCMC simulation study
Source: PubMed Central journal article supplement — RSC Adv. 2021 Mar 30;11(21):12460–9. doi: 10.1039/d0ra10121d (PMC8697253; doi:10.1039/d0ra10121d), 2021-03-30
Supplement: RA-011-D0RA10121D-s001.pdf [file RA-011-D0RA10121D-s001.pdf]

## **Effect of axial molecules and linkers length on CO<sub>2</sub> adsorption and selectivity of CAU-8: A combined DFT and GCMC simulations study**

Diem Thi-Xuan Dang,<sup>\*a,b</sup> Hieu Trung Hoang,<sup>a,b</sup> Tan Le-Hoang Doan,<sup>a,b</sup> Nam Thoai,<sup>b,c</sup> Yoshiyuki Kawazoe,<sup>d,e,f</sup> Duc Nguyen-Manh<sup>g</sup>.

<sup>a</sup> *Center for Innovative Materials and Architectures (INOMAR), Ho Chi Minh City 721337, Vietnam.*

<sup>b</sup> *Vietnam National University - Ho Chi Minh City, Ho Chi Minh City 721337, Vietnam.*

<sup>c</sup> *High Performance Computing Lab and Faculty of Computer Science & Engineering, University of Technology, Ho Chi Minh City 721337, Vietnam.*

<sup>d</sup> *New Industry Creation Hatchery Center, Tohoku University, Sendai 980-8579, Japan.*

<sup>e</sup> *Department of Physics, Suranaree University of Technology, Nakhon, Ratchasima, Thailand.*

<sup>f</sup> *Department of Physics and Nanotechnology, SRM Institute of Science and Technology, Kattankulathur, Tamil Nadu-603203, India.*

<sup>g</sup> *CCFE, United Kingdom Atomic Energy Authority, Culham Science Centre, United Kingdom.*

## Section S1: Computational Details

Lenard-Jones 6-12 terms of potential combined with Coulomb electrostatic potential

$$U(r_{ij}) = 4\varepsilon_{ij} \left[ \left( \frac{\sigma_{ij}}{r_{ij}} \right)^{12} - \left( \frac{\sigma_{ij}}{r_{ij}} \right)^6 \right] + \frac{1}{4\pi\varepsilon_0} \frac{q_i q_j}{r_{ij}}, \quad (1)$$

where  $\varepsilon_0$  is the dielectric constant of vacuum,  $r_{ij}$  is the distance between atom  $i$  and atom  $j$ ,  $q_i$  is the partial electric charge of atom  $i$ .

The parameters  $\varepsilon_{ij}$  and  $\sigma_{ij}$  are respectively the depth and the diameter of Lenard-Jones potential well, and these are totally determined via Lorentz-Berthelot mixing rules given as follows

$$\varepsilon_{ij} = \sqrt{\varepsilon_i \varepsilon_j}, \sigma_{ij} = \frac{1}{2}(\sigma_i + \sigma_j) \quad (2)$$

**Table S1.** LJ potential parameters for gases and frameworks in this work. The charges of gases are provided.

|         | $E/k$ (K) | $\sigma$ (Å) | $q$ (e) |
|---------|-----------|--------------|---------|
| N_n2    | 93.980    | 3.572        | 0.000   |
| C_co2   | 29.660    | 2.789        | 0.576   |
| O_co2   | 82.960    | 3.011        | -0.288  |
| CH4_sp3 | 148.000   | 3.730        | 0.000   |

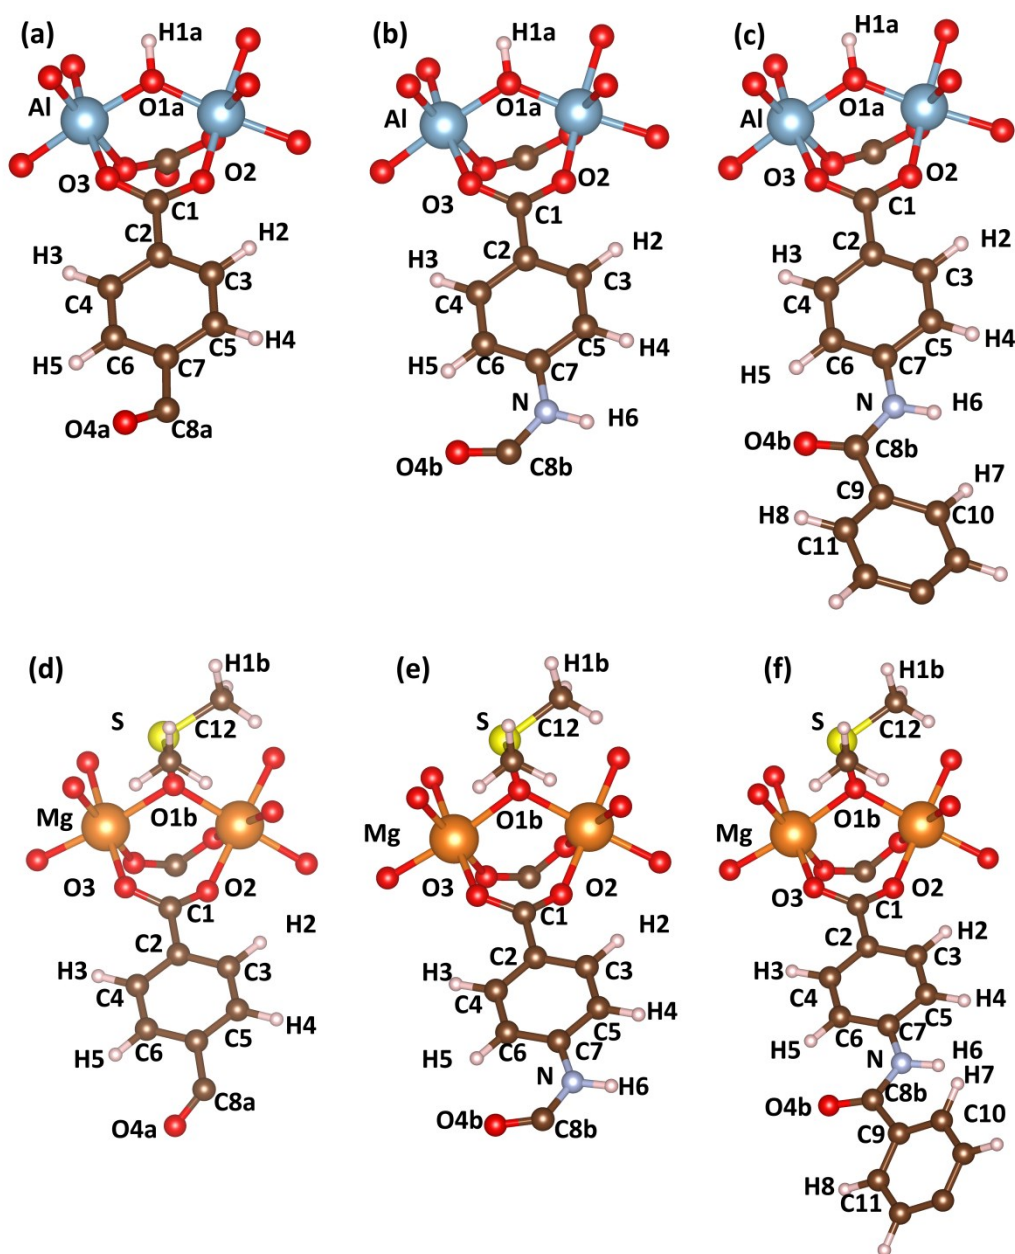

**Figure S1.** Atomic structure of unit framework of (a) CAU-8(Al), (b) **1a**, (c) **1b**, (d) CAU-8(Mg), (e) **2a**, and (f) **2b** with the labels used for force field sites.

**Table S2.** Lennard-Jones parameters used for six MOFs.

|                          | $E/k$ (K) | $\sigma$ (Å) | Reference |
|--------------------------|-----------|--------------|-----------|
| Al                       | -         | -            | S1        |
| Mg                       | -         | -            | -         |
| O1a                      | 93.00     | 3.02         | S2        |
| O1b                      | 176.00    | 2.83         | S3        |
| O2, O3                   | 55.00     | 2.80         | S4        |
| O4a                      | 79.00     | 3.05         |           |
| O4b                      | 79.00     | 3.05         |           |
| C1                       | 20.00     | 3.85         | S6        |
| C2, C7, C9               | 21.00     | 3.88         | S7        |
| C3, C4, C5, C6, C10, C11 | 50.50     | 3.69         |           |
| C8a                      | 40.00     | 3.82         | S4        |
| C8b                      | 34.00     | 3.72         | S5        |
| C5                       | 125.00    | 3.81         | S3        |
| N                        | 111.00    | 3.34         | S5        |
| H_                       | -         | -            | -         |
| S                        | 2.14      | 3.47         | S3        |

**Table S3.** CHELPG charge used for six MOFs.

|     | <b>CAU-8(Al)</b> | <b>1a</b> | <b>1b</b> | <b>CAU-8(Mg)</b> | <b>2a</b> | <b>2b</b> |
|-----|------------------|-----------|-----------|------------------|-----------|-----------|
| Al  | 1.596            | 1.578     | 1.575     | -                | -         | -         |
| Mg  | -                | -         | -         | 1.269            | 1.266     | 1.247     |
| O1a | -0.804           | -0.804    | -0.810    | -                | -         | -         |
| O1b | -                | -         | -         | -0.471           | -0.474    | -0.467    |
| O2  | -0.644           | -0.712    | -0.711    | -0.729           | -0.707    | -0.703    |
| O3  | -0.672           | -0.604    | -0.604    | -0.667           | -0.694    | -0.699    |
| O4a | -0.410           | -         | -         | -0.420           | -         | -         |
| O4b | -                | -0.471    | -0.471    | -                | -0.477    | -0.478    |
| C1  | 0.740            | 0.727     | 0.718     | 0.748            | 0.748     | 0.740     |
| C2  | -0.076           | -0.113    | -0.110    | -0.051           | -0.095    | -0.079    |
| C3  | -0.092           | -0.007    | -0.006    | -0.099           | -0.019    | -0.033    |
| C4  | -0.061           | -0.055    | -0.047    | -0.091           | -0.071    | -0.084    |
| C5  | -0.028           | -0.317    | -0.339    | -0.042           | -0.314    | -0.319    |
| C6  | -0.106           | -0.224    | -0.242    | -0.092           | -0.226    | -0.228    |
| C7  | 0.005            | 0.429     | 0.457     | 0.007            | 0.423     | 0.427     |
| C8a | 0.359            | -         | -         | 0.354            | -         | -         |
| C8b | -                | 0.483     | 0.568     | -                | 0.482     | 0.572     |
| C9  | -                | -         | -0.047    | -                | -         | -0.048    |
| C10 | -                | -         | -0.107    | -                | -         | -0.108    |
| C11 | -                | -         | -0.058    | -                | -         | -0.066    |
| H1a | 0.405            | 0.403     | 0.405     | -                | -         | -         |
| H1b | -                | -         | -         | 0.116            | 0.119     | 0.113     |
| H2  | 0.113            | 0.097     | 0.095     | 0.112            | 0.097     | 0.099     |
| H3  | 0.095            | 0.103     | 0.099     | 0.104            | 0.105     | 0.116     |
| H4  | 0.040            | 0.159     | 0.156     | 0.038            | 0.153     | 0.148     |
| H5  | 0.114            | 0.156     | 0.164     | 0.103            | 0.151     | 0.156     |
| H6  | -                | 0.300     | 0.290     | -                | 0.301     | 0.288     |
| H7  | -                | -         | 0.103     | -                | -         | 0.103     |
| H8  | -                | -         | 0.096     | -                | -         | 0.096     |
| N   | -                | -0.541    | -0.588    | -                | -0.545    | -0.580    |
| S   | -                | -         | -         | 0.290            | 0.298     | 0.286     |

## Section S2: Reaction Mechanism

### Al-H<sub>2</sub>BPDC initial

0 1

|    |             |             |             |
|----|-------------|-------------|-------------|
| Al | -4.92526900 | 0.37984600  | -0.24735500 |
| Al | -1.72185000 | -0.02286900 | 0.34838300  |
| O  | -3.38947000 | 0.55361900  | 0.79843800  |
| O  | -5.00224100 | 2.26228700  | -0.33639000 |
| N  | -5.86224800 | 3.06449900  | -0.99390600 |
| O  | -5.72345400 | 4.25726800  | -0.84613900 |
| N  | 0.22102800  | 1.75053900  | 1.67443900  |
| O  | 0.61349400  | 2.89481400  | 1.63257000  |
| O  | 0.91628200  | 0.81297600  | 2.16961300  |
| O  | 0.39442600  | -1.56326600 | 2.61347300  |
| H  | 0.47122300  | -0.52449200 | 2.34419200  |
| O  | -6.74314700 | 2.53639200  | -1.72018900 |
| H  | -6.67001100 | 0.92248900  | -1.70179500 |
| O  | -5.91886700 | 0.20228400  | 1.34849900  |
| O  | -0.98883800 | 1.48398000  | 1.21672300  |
| O  | -1.72594800 | -1.11280700 | 2.06286600  |
| O  | -7.75368100 | -0.82758500 | 0.58251300  |
| O  | -3.80178000 | 0.38195600  | -1.90752600 |
| O  | -1.69900700 | 0.88251800  | -1.35121600 |
| N  | -2.71240200 | 0.99747600  | -2.18336900 |
| O  | -2.56974400 | 1.63280700  | -3.19696400 |
| H  | -3.46910000 | 1.20696500  | 1.51161400  |
| N  | -0.88674000 | -1.93828800 | 2.55760100  |
| O  | -1.18686400 | -3.01676700 | 2.98554000  |
| N  | -7.09977600 | -0.39867500 | 1.57095100  |
| O  | -7.46644900 | -0.49101100 | 2.72040300  |
| O  | -6.36063800 | 0.00440300  | -1.40483000 |
| H  | -7.06994800 | -0.38582900 | -0.78908300 |
| O  | -0.07567700 | -2.78183000 | -0.95171500 |
| C  | 0.56881200  | -1.68821400 | -0.61382800 |
| O  | -0.01894300 | -0.68733200 | -0.10500400 |
| C  | 2.01265500  | -1.66429900 | -0.83110900 |
| C  | 2.71395800  | -2.85687600 | -1.10963900 |
| C  | 2.68578800  | -0.42883600 | -0.76370100 |
| C  | 4.08950100  | -2.81166500 | -1.29136300 |
| H  | 2.17286300  | -3.80177700 | -1.17258900 |
| C  | 4.06762000  | -0.40080300 | -0.94367700 |
| H  | 2.11828600  | 0.49817200  | -0.63280600 |
| C  | 4.78065800  | -1.58890000 | -1.18656500 |
| H  | 4.65974800  | -3.71235000 | -1.52370300 |
| H  | 4.59130300  | 0.55621000  | -0.92205800 |
| O  | 6.72041200  | -2.42182800 | -2.24936300 |
| C  | 7.15061000  | -0.61014200 | -0.77435000 |
| C  | 6.83950500  | -0.05578800 | 0.48249800  |
| C  | 8.37856100  | -0.29556300 | -1.38610100 |
| C  | 7.73691000  | 0.80794100  | 1.10722100  |
| H  | 5.90748200  | -0.32229000 | 0.98390200  |
| C  | 9.26607600  | 0.58368900  | -0.77339900 |

|   |             |             |             |
|---|-------------|-------------|-------------|
| H | 8.61185000  | -0.75846200 | -2.34651600 |
| C | 8.94685900  | 1.13983900  | 0.47861500  |
| H | 7.52356500  | 1.24032800  | 2.08620700  |
| H | 10.21114200 | 0.84352800  | -1.25084300 |
| C | 9.86011200  | 2.08135100  | 1.18954700  |
| O | 10.99954700 | 2.33291000  | 0.48628300  |
| O | 9.63137400  | 2.57995200  | 2.27654600  |
| H | 11.51327800 | 2.95229700  | 1.04157300  |
| C | 6.26259300  | -1.59916800 | -1.46000400 |
| N | -3.58643400 | -2.31141800 | -0.36503200 |
| O | -4.63241300 | -1.62253500 | -0.22547600 |
| O | -3.58751400 | -3.51548400 | -0.43725700 |
| O | -2.41135500 | -1.67696200 | -0.46662700 |
| O | 0.95289400  | 2.21263800  | -1.24997700 |
| H | 0.07597000  | 1.95828300  | -1.59063200 |
| H | 0.76853000  | 2.98088000  | -0.68442300 |
| H | -1.05811500 | -2.62614900 | -0.79439800 |

### Al-H<sub>2</sub>BPDC TS

0 1

|    |             |             |             |
|----|-------------|-------------|-------------|
| Al | 3.33515800  | -1.14208900 | 0.38265100  |
| Al | 1.16691000  | 1.39659300  | 0.14827000  |
| O  | 2.84174800  | 0.69154500  | 0.30499200  |
| O  | 2.86487300  | -1.12575800 | 2.23112700  |
| N  | 3.26892600  | -1.95412400 | 3.20705900  |
| O  | 3.08686900  | -1.59674300 | 4.34999000  |
| N  | 1.46146300  | 3.66869200  | 2.05591000  |
| O  | 2.16586700  | 4.23814800  | 2.84717800  |
| O  | 0.49857900  | 4.28915200  | 1.42295200  |
| O  | 0.85521100  | 5.03509900  | -1.09861500 |
| H  | 0.87666200  | 4.91697900  | -0.08764200 |
| O  | 3.79288900  | -3.05228600 | 2.88324400  |
| H  | 3.76747000  | -3.26222300 | 1.27787400  |
| O  | 5.09861900  | -0.61702400 | 0.78633800  |
| O  | 1.62258000  | 2.39885900  | 1.81028700  |
| O  | 1.88459700  | 3.10296300  | -0.73266200 |
| O  | 6.11635000  | -2.21958700 | -0.38759200 |
| O  | 1.34692300  | -1.59944100 | 0.13072200  |
| O  | 0.19744700  | 0.05058500  | 1.08178700  |
| N  | 0.39727700  | -1.24511100 | 0.91236000  |
| O  | -0.34642200 | -2.02741400 | 1.44270100  |
| H  | 3.46354200  | 1.20285600  | 0.85170200  |
| N  | 1.33848900  | 3.85584400  | -1.59149600 |
| O  | 1.24174400  | 3.66121500  | -2.76284400 |
| N  | 6.20943100  | -1.11661400 | 0.20980600  |
| O  | 7.22953900  | -0.47633800 | 0.31859500  |
| O  | 3.71231500  | -3.00309400 | 0.29941700  |

|   |              |             |             |
|---|--------------|-------------|-------------|
| H | 4.65924800   | -2.98502600 | -0.04537900 |
| O | 0.98574200   | -0.75342000 | -3.20973300 |
| C | 0.35823900   | -0.21026200 | -2.23716400 |
| O | 0.84015100   | 0.77665800  | -1.58519200 |
| C | -0.97212600  | -0.77733100 | -1.91057000 |
| C | -1.16997500  | -2.16773900 | -2.00771500 |
| C | -2.01691500  | 0.06153000  | -1.48840600 |
| C | -2.39457800  | -2.71368300 | -1.63898800 |
| H | -0.34599800  | -2.80080600 | -2.33879600 |
| C | -3.25137100  | -0.48906200 | -1.14694600 |
| H | -1.86167800  | 1.14117400  | -1.46658200 |
| C | -3.44132800  | -1.88109900 | -1.20387600 |
| H | -2.57186000  | -3.79022300 | -1.67230000 |
| H | -4.07505800  | 0.15563800  | -0.83417000 |
| O | -4.91041500  | -3.72659300 | -0.87600600 |
| C | -5.83840100  | -1.60951900 | -0.30504900 |
| C | -5.95951100  | -1.35665800 | 1.07114600  |
| C | -6.75565700  | -1.04606600 | -1.20542800 |
| C | -6.98986500  | -0.54353300 | 1.54008700  |
| H | -5.24836900  | -1.80230000 | 1.77027700  |
| C | -7.78942600  | -0.23491100 | -0.73451500 |
| H | -6.66275100  | -1.24924400 | -2.27470900 |
| C | -7.90765200  | 0.02251000  | 0.64089500  |
| H | -7.10780000  | -0.33276000 | 2.60458200  |
| H | -8.50962800  | 0.20181400  | -1.42699000 |
| C | -8.98427400  | 0.88655400  | 1.20081000  |
| O | -9.82414500  | 1.36538600  | 0.23872100  |
| O | -9.11865100  | 1.15195000  | 2.38185400  |
| H | -10.48117700 | 1.90640400  | 0.71965500  |
| C | -4.74196400  | -2.51709500 | -0.80725300 |
| N | 3.92433000   | -0.21102200 | -2.27956900 |
| O | 3.37006500   | -1.15692700 | -1.55234300 |
| O | 4.95895700   | 0.33160200  | -1.95888300 |
| O | 3.30669700   | 0.07673500  | -3.35827900 |
| O | -0.55914400  | 2.34728700  | 0.20215600  |
| H | -1.21535200  | 1.78148600  | 0.65026700  |
| H | -0.38141500  | 3.17961400  | 0.77330000  |
| H | 2.02477600   | -0.39788800 | -3.28299600 |

### Al-H<sub>2</sub>BPDC final

0 1

|    |            |             |             |
|----|------------|-------------|-------------|
| Al | 3.16146900 | -0.90355700 | 0.47631500  |
| Al | 2.12872900 | 2.14143000  | 0.05565100  |
| O  | 3.25482100 | 0.77832100  | -0.36737300 |
| O  | 4.91750300 | -0.51135200 | 1.11035500  |



|   |             |             |             |
|---|-------------|-------------|-------------|
| N | 5.60128100  | -1.00912600 | 2.15793800  |
| O | 6.66734900  | -0.49541100 | 2.41547800  |
| N | 3.64493400  | 4.46697800  | -0.97332100 |
| O | 4.66922700  | 4.87523100  | -1.45358600 |
| O | 2.52044100  | 5.11285700  | -1.08749000 |
| O | 0.65978100  | 4.28366100  | -2.79576500 |
| H | 1.48869800  | 4.64818700  | -2.33503600 |
| O | 5.09986000  | -1.96506700 | 2.80338600  |
| H | 3.72939500  | -2.47579000 | 2.12557600  |
| O | 3.72507700  | -1.68494100 | -1.14219700 |
| O | 3.63215300  | 3.35078100  | -0.29167500 |
| O | 1.70246200  | 2.51024400  | -1.95119000 |
| O | 3.79675700  | -3.85286800 | -0.59550000 |
| O | 2.45900400  | -0.01408100 | 2.19110500  |
| N | 2.60178100  | 1.14352200  | 2.70772400  |
| O | 2.45121400  | 2.20438400  | 1.92828900  |
| O | 2.82200000  | 1.31182300  | 3.87961600  |
| H | 4.16892000  | 1.01343000  | -0.60142200 |
| N | 0.64587900  | 2.95364400  | -2.47900400 |
| O | -0.33317600 | 2.33116900  | -2.76224600 |
| N | 4.11340800  | -2.94353900 | -1.40920900 |
| O | 4.72654600  | -3.12965800 | -2.43458600 |
| O | 2.96892700  | -2.50666900 | 1.45589200  |
| H | 3.18518300  | -3.23740200 | 0.79093900  |
| O | 1.28715200  | -1.04315100 | -0.02884900 |
| C | 0.36443300  | -0.16091600 | 0.01040700  |
| O | 0.58830600  | 1.10054500  | 0.12534400  |
| C | -1.04584900 | -0.59705800 | -0.06487100 |
| C | -1.37990200 | -1.94258300 | 0.18151600  |
| C | -2.05161300 | 0.33456900  | -0.37637700 |
| C | -2.70883900 | -2.34682700 | 0.10794100  |
| H | -0.59824500 | -2.65734300 | 0.44470400  |
| C | -3.38196100 | -0.07400200 | -0.43594700 |
| H | -1.77514900 | 1.36863500  | -0.58338500 |
| C | -3.72214700 | -1.41706100 | -0.18622100 |
| H | -2.98855400 | -3.38837700 | 0.27453000  |
| H | -4.15948300 | 0.64387700  | -0.70233100 |
| O | -5.32514600 | -3.07958400 | -0.70187200 |
| C | -6.28166300 | -1.02721400 | 0.00916200  |
| C | -6.18782800 | 0.00084000  | 0.96686800  |
| C | -7.51850800 | -1.28654900 | -0.60950100 |
| C | -7.30882000 | 0.76466700  | 1.28577200  |
| H | -5.24336700 | 0.18135300  | 1.48339000  |
| C | -8.63398200 | -0.51054500 | -0.30831300 |
| H | -7.57684400 | -2.10893200 | -1.32468900 |
| C | -8.53192300 | 0.52150100  | 0.64196700  |

|   |              |             |             |
|---|--------------|-------------|-------------|
| H | -7.26464800  | 1.55752100  | 2.03442500  |
| H | -9.59041200  | -0.69733300 | -0.79725100 |
| C | -9.69124600  | 1.38354200  | 1.01192500  |
| O | -10.82586200 | 1.05118700  | 0.33480000  |
| O | -9.65002200  | 2.28955100  | 1.82495000  |
| H | -11.50859600 | 1.67279500  | 0.65622500  |
| C | -5.13115000  | -1.92879000 | -0.31979700 |
| N | 0.84481200   | -4.41382000 | -1.33230200 |
| O | 0.78341300   | -4.42149500 | -0.10947500 |
| O | 0.77150000   | -5.32478000 | -2.11371100 |
| O | 1.02130700   | -3.13643300 | -1.94560900 |
| O | 0.99007400   | 3.70237700  | 0.37481300  |
| H | 0.82735300   | 3.84577500  | 1.32392700  |
| H | 1.49448900   | 4.49108300  | -0.01785200 |
| H | 1.09465300   | -2.50801600 | -1.18048800 |

### Al-H<sub>2</sub>ODA initial

0 1

|    |             |             |             |
|----|-------------|-------------|-------------|
| Al | -6.28671300 | 0.24687200  | -0.55325200 |
| Al | -3.19517000 | -0.04312800 | 0.51438300  |
| O  | -4.98546700 | 0.17008500  | 0.78142800  |
| O  | -6.64860400 | 2.01659000  | -0.00540100 |
| N  | -7.51536100 | 2.91859300  | -0.50424500 |
| O  | -7.59481800 | 3.98088200  | 0.06991700  |
| N  | -1.81511800 | 1.29852800  | 2.74462100  |
| O  | -1.61677700 | 2.40953800  | 3.18426000  |
| O  | -1.06426800 | 0.31603300  | 3.02097100  |
| O  | -1.24659300 | -2.09893400 | 2.50288100  |
| H  | -1.29986100 | -1.03409900 | 2.62519800  |
| O  | -8.17840600 | 2.61416900  | -1.52906600 |
| H  | -7.84767900 | 1.12149000  | -2.05491500 |
| O  | -7.48536000 | -0.58816900 | 0.64555300  |
| O  | -2.87290000 | 1.10730200  | 1.97734600  |
| O  | -3.29847700 | -1.68061300 | 1.71759400  |
| O  | -8.97944800 | -1.43972300 | -0.78811500 |
| O  | -4.93279000 | 0.96236100  | -1.84602600 |
| O  | -3.05515400 | 1.42238300  | -0.73102600 |
| N  | -3.92792300 | 1.73671400  | -1.66354900 |
| O  | -3.73202800 | 2.70933000  | -2.34752700 |
| H  | -5.27460300 | 0.52933300  | 1.63538700  |
| N  | -2.42411400 | -2.54652900 | 2.05628900  |
| O  | -2.60609000 | -3.73048000 | 2.01188600  |
| N  | -8.57059000 | -1.33990700 | 0.40023700  |
| O  | -9.09626400 | -1.88059400 | 1.34688900  |
| O  | -7.44433200 | 0.19241300  | -2.03690900 |

|   |             |             |             |
|---|-------------|-------------|-------------|
| H | -8.16883300 | -0.46206900 | -1.75149100 |
| O | -0.93639300 | -1.97968700 | -1.26035100 |
| C | -0.54101300 | -1.00681500 | -0.46487400 |
| O | -1.36514600 | -0.32706600 | 0.22431600  |
| C | 0.88229000  | -0.73920700 | -0.38698400 |
| C | 1.81794500  | -1.63610500 | -0.94501900 |
| C | 1.32503100  | 0.43883700  | 0.25474900  |
| C | 3.17900400  | -1.38695300 | -0.84927700 |
| H | 1.46590000  | -2.53922200 | -1.44504200 |
| C | 2.68326400  | 0.69806900  | 0.33624400  |
| H | 0.59805400  | 1.17027900  | 0.62059400  |
| C | 3.62087500  | -0.21154700 | -0.20014800 |
| H | 3.91175600  | -2.07622000 | -1.26350200 |
| H | 3.03264800  | 1.61802500  | 0.81118500  |
| N | 4.97087600  | 0.10296300  | -0.06971100 |
| H | 5.23029700  | 0.97119800  | 0.41419000  |
| O | 6.09738000  | -1.65849200 | -1.10595700 |
| C | 7.35504800  | 0.17563300  | -0.10434800 |
| O | 7.30325300  | 1.24529800  | 0.50642900  |
| N | 8.45492800  | -0.50312100 | -0.52551600 |
| H | 8.21739200  | -1.37276100 | -1.01335200 |
| C | 9.81170100  | -0.17724100 | -0.38123500 |
| C | 10.75466200 | -1.07288100 | -0.92264100 |
| C | 10.24305100 | 0.99245300  | 0.27476600  |
| C | 12.11474800 | -0.80718400 | -0.81223400 |
| H | 10.41120500 | -1.97820700 | -1.43023700 |
| H | 9.50673900  | 1.67795100  | 0.68937400  |
| C | 11.60752900 | 1.24553600  | 0.37797400  |
| C | 12.55350100 | 0.35756800  | -0.15900900 |
| H | 12.84626700 | -1.49873200 | -1.23040400 |
| H | 11.96926200 | 2.14396100  | 0.88106700  |
| C | 13.99260300 | 0.69441200  | -0.00994500 |
| O | 14.42329100 | 1.68926900  | 0.54672600  |
| O | 14.81141500 | -0.24349200 | -0.57200400 |
| H | 15.71806000 | 0.08462100  | -0.41177300 |
| N | -4.53565300 | -2.07743500 | -1.29719500 |
| O | -5.68848200 | -1.58591500 | -1.15379700 |
| O | -4.33476300 | -3.16939700 | -1.76934400 |
| O | -3.47791400 | -1.34414800 | -0.93537100 |
| O | -0.71885800 | 2.88888100  | 0.38419200  |
| H | -1.13376000 | 3.35242500  | 1.13070200  |
| H | -1.46828500 | 2.67434800  | -0.20089700 |
| H | -1.94049600 | -1.99259200 | -1.26097000 |
| C | 6.07026900  | -0.58951500 | -0.49840200 |

**Al-H<sub>2</sub>ODA TS**

|     |             |             |             |
|-----|-------------|-------------|-------------|
| 0 1 |             |             |             |
| Al  | -3.80471400 | 1.90415900  | -0.02596000 |
| Al  | -3.16008600 | -1.32109100 | 0.57458300  |
| O   | -4.23539100 | 0.14088600  | 0.49294300  |
| O   | -3.34238200 | 2.31228400  | 1.79052700  |
| N   | -2.53761100 | 3.26492200  | 2.27990500  |
| O   | -2.36276700 | 3.28521700  | 3.47947500  |
| N   | -4.42308300 | -2.68767000 | 2.90474700  |
| O   | -5.26011700 | -2.65049500 | 3.76698100  |
| O   | -3.99870500 | -3.84125600 | 2.41893000  |
| O   | -4.86287400 | -4.70308100 | 0.13558400  |
| H   | -4.71127900 | -4.36332500 | 1.09730900  |
| O   | -2.00401400 | 4.08059600  | 1.47707700  |
| H   | -2.63245200 | 3.93425300  | 0.01267000  |
| O   | -5.61884400 | 2.33537200  | 0.23963300  |
| O   | -3.88216600 | -1.60863000 | 2.43584100  |
| O   | -4.70929200 | -2.49658700 | 0.03502600  |
| O   | -5.63648900 | 4.47487500  | -0.40480700 |
| O   | -1.83135300 | 1.28281100  | -0.18367800 |
| O   | -1.63561400 | -0.41401900 | 1.24760200  |
| N   | -1.13529300 | 0.68425600  | 0.70701000  |
| O   | -0.03856200 | 1.05208400  | 1.03906800  |
| H   | -5.20269500 | 0.02568300  | 0.47468000  |
| N   | -4.75649400 | -3.58377600 | -0.62555000 |
| O   | -4.75656500 | -3.69512500 | -1.81036400 |
| N   | -6.26498800 | 3.49644100  | 0.08174300  |
| O   | -7.42898300 | 3.53469200  | 0.41382800  |
| O   | -3.22960900 | 3.56235600  | -0.71850900 |
| H   | -4.08354400 | 4.10878800  | -0.71948000 |
| O   | -2.01438700 | -0.51404200 | -3.18638000 |
| C   | -1.69562300 | -0.99375500 | -2.03466000 |
| O   | -2.58447700 | -1.41174100 | -1.21485100 |
| C   | -0.25726700 | -1.03095300 | -1.72807700 |
| C   | 0.58745500  | -0.03454700 | -2.25336400 |
| C   | 0.28560000  | -2.03259200 | -0.90222800 |
| C   | 1.93743800  | 0.00122300  | -1.92618900 |
| H   | 0.16015100  | 0.73733100  | -2.89404800 |
| C   | 1.63839000  | -2.02345100 | -0.59359500 |
| H   | -0.35366600 | -2.84189700 | -0.54892100 |
| C   | 2.47227400  | -0.99581800 | -1.08409200 |
| H   | 2.58789000  | 0.78831800  | -2.30182600 |
| H   | 2.06694600  | -2.81353300 | 0.02794500  |
| N   | 3.81433600  | -1.01732500 | -0.70845400 |
| H   | 4.14157400  | -1.75876000 | -0.07788100 |
| O   | 4.75854100  | 0.83176800  | -1.77320600 |
| C   | 6.13229500  | -0.59336200 | -0.34862900 |

|   |             |             |             |
|---|-------------|-------------|-------------|
| O | 6.17434600  | -1.59223900 | 0.37374900  |
| N | 7.13964800  | 0.26265000  | -0.66380100 |
| H | 6.83295900  | 1.01615100  | -1.28778600 |
| C | 8.48181300  | 0.24762800  | -0.25667000 |
| C | 9.31591600  | 1.27761400  | -0.73398100 |
| C | 9.00238600  | -0.74580700 | 0.59581700  |
| C | 10.65614700 | 1.31839300  | -0.36689500 |
| H | 8.90336500  | 2.04542000  | -1.39384100 |
| C | 10.34541200 | -0.69181600 | 0.95595900  |
| H | 8.34933500  | -1.53644000 | 0.95962200  |
| C | 11.18336200 | 0.33110500  | 0.48352900  |
| H | 11.30347800 | 2.11435100  | -0.73518100 |
| H | 10.77437300 | -1.44733600 | 1.61650000  |
| C | 12.60549200 | 0.32412100  | 0.91227700  |
| O | 13.10564900 | -0.49731900 | 1.66095400  |
| O | 13.32082400 | 1.35514500  | 0.37269300  |
| H | 14.22557800 | 1.24666900  | 0.72619400  |
| N | -4.84929400 | 0.45888700  | -2.32167800 |
| O | -3.96297700 | 1.32578000  | -1.88823100 |
| O | -5.93606000 | 0.31595200  | -1.78571600 |
| O | -4.49859800 | -0.21940900 | -3.33627100 |
| O | -2.11562400 | -2.95647300 | 0.97880100  |
| H | -2.71547800 | -3.48369900 | 1.62539000  |
| H | -1.32725300 | -2.67187900 | 1.47844600  |
| H | -3.07026800 | -0.36221600 | -3.28619300 |
| C | 4.82137100  | -0.15492800 | -1.04198800 |

### Al-H<sub>2</sub>ODA final

0 1

|    |            |             |             |
|----|------------|-------------|-------------|
| Al | 3.94708800 | -1.44690600 | 0.26365800  |
| Al | 4.11562000 | 1.78614700  | 0.32575400  |
| O  | 4.63559900 | 0.18861800  | -0.36878600 |
| O  | 5.74953800 | -1.82559700 | 0.77186500  |
| N  | 6.24169800 | -2.69266500 | 1.67502500  |
| O  | 7.43215500 | -2.64571500 | 1.89462800  |
| N  | 6.34867300 | 3.52838600  | -0.54594800 |
| O  | 7.42907000 | 3.60226200  | -1.06993200 |
| O  | 5.54658800 | 4.55057800  | -0.46625300 |
| O  | 3.43092400 | 4.72938500  | -2.06902100 |
| H  | 4.35612100 | 4.69136700  | -1.65143400 |
| O  | 5.44863300 | -3.49213200 | 2.23584100  |
| H  | 3.96017900 | -3.35513000 | 1.63517100  |
| O  | 4.11832100 | -2.12872400 | -1.48619700 |
| O  | 5.94736900 | 2.40419700  | -0.01244300 |
| O  | 3.77615100 | 2.58921000  | -1.57229700 |

|   |              |             |             |
|---|--------------|-------------|-------------|
| O | 3.37745600   | -4.22336800 | -1.23015200 |
| O | 3.71046700   | -0.63624400 | 2.13847000  |
| O | 4.52207200   | 1.44546000  | 2.15251900  |
| N | 4.29159800   | 0.30085300  | 2.77897100  |
| O | 4.59880700   | 0.20389800  | 3.93972300  |
| H | 5.56278900   | 0.10572200  | -0.64975500 |
| N | 2.93779400   | 3.46067900  | -1.92945100 |
| O | 1.78571300   | 3.28744100  | -2.19239800 |
| N | 3.98706100   | -3.38327300 | -1.94618000 |
| O | 4.44467500   | -3.62539400 | -3.03939500 |
| O | 3.21342500   | -3.00130800 | 1.04788300  |
| H | 3.10663200   | -3.64723600 | 0.27721900  |
| O | 2.14477100   | -0.81761300 | -0.07474700 |
| C | 1.61671100   | 0.32474300  | 0.16417400  |
| O | 2.30732400   | 1.38488100  | 0.41212700  |
| C | 0.15372400   | 0.44977400  | 0.17114700  |
| C | -0.65814100  | -0.69707300 | 0.25815400  |
| C | -0.44886200  | 1.72158200  | 0.10508600  |
| C | -2.04404700  | -0.59094400 | 0.26879100  |
| H | -0.19513300  | -1.68154700 | 0.34417500  |
| C | -1.83003000  | 1.83797200  | 0.10202300  |
| H | 0.18168900   | 2.60839800  | 0.03988500  |
| C | -2.64054700  | 0.68414200  | 0.18193500  |
| H | -2.67436300  | -1.47469300 | 0.34456700  |
| H | -2.29932700  | 2.82257500  | 0.03457100  |
| N | -4.02328700  | 0.86619800  | 0.17523100  |
| H | -4.39584900  | 1.82088900  | 0.11331600  |
| O | -4.90852000  | -1.28809100 | 0.31723200  |
| C | -6.39699400  | 0.63827800  | 0.19257200  |
| O | -6.49087400  | 1.86573700  | 0.11753800  |
| N | -7.39629300  | -0.28177600 | 0.24789400  |
| H | -7.04097700  | -1.24191800 | 0.30624000  |
| C | -8.78532700  | -0.09021100 | 0.23456700  |
| C | -9.59957500  | -1.23802300 | 0.29984700  |
| C | -9.37165300  | 1.18869100  | 0.15954600  |
| H | -9.13652800  | -2.22666400 | 0.35721100  |
| C | -10.75885600 | 1.29740500  | 0.15145800  |
| H | -8.73369100  | 2.06869700  | 0.10899000  |
| C | -11.57705600 | 0.15801600  | 0.21644500  |
| H | -11.61592900 | -2.00136000 | 0.34098800  |
| H | -11.23917700 | 2.27574200  | 0.09399900  |
| C | -13.04930600 | 0.35251600  | 0.20327700  |
| O | -13.61150800 | 1.43221000  | 0.14062600  |
| O | -13.73492900 | -0.82721500 | 0.27009300  |
| H | -14.67816800 | -0.57168200 | 0.25379100  |
| C | -10.98421700 | -1.11441800 | 0.29077800  |

|   |             |             |             |
|---|-------------|-------------|-------------|
| N | 0.40893000  | -3.51758300 | -1.76825900 |
| O | 0.39807900  | -3.71017800 | -0.55920600 |
| O | -0.04149100 | -4.18958300 | -2.65895000 |
| O | 1.03670700  | -2.31597200 | -2.21008700 |
| O | 3.66238400  | 3.58909400  | 0.94666200  |
| H | 4.40961200  | 4.18885300  | 0.61226500  |
| H | 3.60642800  | 3.63082200  | 1.91773900  |
| H | 1.37589200  | -1.89411700 | -1.37615600 |
| C | -5.02079900 | -0.06599700 | 0.23705700  |

**Al-H<sub>2</sub>TDA initial**

0 1

|    |              |             |             |
|----|--------------|-------------|-------------|
| Al | -7.80092000  | 0.42039400  | -0.49303800 |
| Al | -4.69806800  | -0.00304400 | 0.49430800  |
| O  | -6.45605900  | 0.37065400  | 0.79889500  |
| O  | -8.01197800  | 2.25589500  | -0.10370600 |
| N  | -8.83781100  | 3.16865800  | -0.64952300 |
| O  | -8.81900400  | 4.28147900  | -0.17414100 |
| N  | -3.13868900  | 1.43586700  | 2.53890000  |
| O  | -2.84122100  | 2.56601100  | 2.85874100  |
| O  | -2.45258500  | 0.42987000  | 2.88826300  |
| O  | -2.83021300  | -2.00426800 | 2.61427800  |
| H  | -2.80097400  | -0.93315400 | 2.63218500  |
| O  | -9.56626900  | 2.82131000  | -1.61454800 |
| H  | -9.35900600  | 1.26774900  | -2.01361200 |
| O  | -9.00960600  | -0.20374000 | 0.81960000  |
| O  | -4.23642600  | 1.25399500  | 1.82814100  |
| O  | -6.45300200  | 0.90845600  | -1.89283800 |
| O  | -10.61049600 | -1.08004600 | -0.47707600 |
| O  | -4.87504400  | -1.50616200 | 1.85719900  |
| O  | -4.50328800  | 1.32539000  | -0.89034200 |
| N  | -5.38737000  | 1.61690400  | -1.81912200 |
| O  | -5.14866100  | 2.50328900  | -2.60004400 |
| H  | -6.68243000  | 0.83379900  | 1.62117400  |
| N  | -4.05437700  | -2.40049300 | 2.25061000  |
| O  | -4.32365800  | -3.56596200 | 2.32795200  |
| N  | -10.15069300 | -0.89767900 | 0.68256500  |
| O  | -10.67491200 | -1.30872600 | 1.69317200  |
| O  | -9.01958800  | 0.31755500  | -1.92477600 |
| H  | -9.77478800  | -0.25476800 | -1.55501100 |
| O  | -2.65656500  | -2.28061200 | -1.13133000 |
| C  | -2.16122500  | -1.25979300 | -0.45998700 |
| O  | -2.91012500  | -0.45063600 | 0.17574000  |
| C  | -0.72363000  | -1.09037100 | -0.45510800 |
| C  | 0.12926100   | -2.10105900 | -0.94789700 |

|   |             |             |             |
|---|-------------|-------------|-------------|
| C | -0.17532600 | 0.11071600  | 0.04878500  |
| C | 1.50689400  | -1.94344300 | -0.92323800 |
| H | -0.30128000 | -3.02225700 | -1.34267600 |
| C | 1.19829300  | 0.27675200  | 0.05861300  |
| H | -0.83441500 | 0.92596100  | 0.36222800  |
| C | 2.05665800  | -0.74418100 | -0.41202800 |
| H | 2.17286900  | -2.71722400 | -1.29630600 |
| H | 1.62355900  | 1.21429900  | 0.42721400  |
| N | 3.42715700  | -0.50456800 | -0.34310200 |
| H | 3.68656900  | 0.41114800  | 0.01755700  |
| O | 4.32110200  | -2.36863300 | -1.37537000 |
| C | 9.84308700  | 0.71410000  | 0.23487200  |
| O | 9.98154300  | 1.79026000  | 0.81071100  |
| N | 10.89104200 | -0.08566400 | -0.18741300 |
| H | 10.63647000 | -1.00556100 | -0.53892700 |
| C | 12.27223900 | 0.14989600  | -0.09717200 |
| C | 13.12937100 | -0.87469300 | -0.54998400 |
| C | 12.82054800 | 1.34660200  | 0.40722400  |
| C | 14.50873400 | -0.71440200 | -0.50183300 |
| H | 12.70249200 | -1.80249200 | -0.94253800 |
| C | 14.20393300 | 1.49415900  | 0.44856200  |
| H | 12.15567500 | 2.13032200  | 0.76169800  |
| C | 15.06134500 | 0.47695200  | -0.00023500 |
| H | 15.16768800 | -1.50906700 | -0.85211100 |
| H | 14.65024600 | 2.41197800  | 0.83558800  |
| C | 16.52481400 | 0.70727300  | 0.07601100  |
| O | 17.05468000 | 1.71928400  | 0.50196800  |
| O | 17.24930700 | -0.35468000 | -0.39066800 |
| H | 18.18280100 | -0.08394000 | -0.28861800 |
| N | -6.25712800 | -2.09079000 | -1.06208600 |
| O | -6.15729900 | -3.23619800 | -1.42792100 |
| O | -7.36434200 | -1.49932300 | -0.93339700 |
| O | -5.13506200 | -1.41056400 | -0.80952000 |
| O | -2.02462200 | 2.71987900  | -0.00343600 |
| H | -2.38799400 | 3.26655000  | 0.71319100  |
| H | -2.80576500 | 2.49676000  | -0.54206700 |
| H | -3.65716200 | -2.21482400 | -1.10367400 |
| C | 5.84442900  | -0.74993500 | -0.49790300 |
| C | 6.11964800  | 0.16877900  | 0.53188500  |
| C | 6.89992300  | -1.21819200 | -1.29696600 |
| C | 7.42001300  | 0.62047500  | 0.74448700  |
| H | 5.33031600  | 0.51157600  | 1.20638300  |
| C | 8.20007500  | -0.76560900 | -1.08346100 |
| H | 6.67163800  | -1.93478800 | -2.08746500 |
| C | 8.47579400  | 0.15151200  | -0.05320900 |
| H | 7.65002500  | 1.34074800  | 1.53115000  |



|   |            |             |             |
|---|------------|-------------|-------------|
| H | 8.99139000 | -1.10669800 | -1.75614200 |
| C | 4.48031500 | -1.30513300 | -0.78574100 |

### Al-H<sub>2</sub>TDA TS

0 1

|    |             |             |             |
|----|-------------|-------------|-------------|
| Al | 5.29344400  | -1.84771700 | 0.13785600  |
| Al | 4.38205500  | 1.32572600  | 0.67187300  |
| O  | 5.60364300  | -0.02483100 | 0.57864200  |
| O  | 4.67325500  | -2.11048900 | 1.92671200  |
| N  | 4.60620500  | -3.24843900 | 2.63206800  |
| O  | 4.46541800  | -3.15229000 | 3.83206700  |
| N  | 5.43343800  | 2.65161100  | 3.13908800  |
| O  | 6.24971300  | 2.63744800  | 4.02300500  |
| O  | 4.86283800  | 3.76559000  | 2.75193400  |
| O  | 5.69711400  | 4.95302200  | 0.53027100  |
| H  | 5.58165200  | 4.56446700  | 1.46435900  |
| O  | 4.67396200  | -4.34366900 | 2.01395100  |
| H  | 4.73119600  | -4.10506700 | 0.41164900  |
| O  | 7.06019900  | -2.24101400 | 0.66789200  |
| O  | 5.07280100  | 1.55236300  | 2.54252800  |
| O  | 5.80977600  | 2.74890300  | 0.29555700  |
| O  | 7.46501400  | -3.76944100 | -0.90715600 |
| O  | 3.32871500  | -1.34645000 | -0.20169600 |
| O  | 2.86776100  | 0.30738700  | 1.21413100  |
| N  | 2.52478300  | -0.84130100 | 0.65456900  |
| O  | 1.46034700  | -1.33031400 | 0.92866900  |
| H  | 6.32594600  | 0.01655300  | 1.22943100  |
| N  | 5.70169200  | 3.86279800  | -0.29522900 |
| O  | 5.64488100  | 4.05444800  | -1.46944800 |
| N  | 7.92951200  | -2.99582500 | -0.03095700 |
| O  | 9.10324700  | -2.89237400 | 0.24300200  |
| O  | 4.88819500  | -3.60773100 | -0.45708600 |
| H  | 5.79336800  | -3.89995100 | -0.79098200 |
| O  | 3.69006200  | 0.43102800  | -3.12999900 |
| C  | 3.21008200  | 0.91567000  | -2.04081000 |
| O  | 3.97148200  | 1.41714200  | -1.14065800 |
| C  | 1.74909700  | 0.87760000  | -1.89258100 |
| C  | 1.01227900  | -0.15550000 | -2.50168700 |
| C  | 1.07143500  | 1.84708300  | -1.12975300 |
| C  | -0.36230900 | -0.25769700 | -2.32495800 |
| H  | 1.54209200  | -0.90490700 | -3.09063100 |
| C  | -0.30439400 | 1.77204500  | -0.97186300 |
| H  | 1.62862200  | 2.68420200  | -0.70790000 |
| C  | -1.03691700 | 0.71017200  | -1.54971500 |
| H  | -0.92799700 | -1.07630800 | -2.76246800 |

|   |              |             |             |
|---|--------------|-------------|-------------|
| H | -0.83132400  | 2.54322100  | -0.40300500 |
| N | -2.41419100  | 0.68631900  | -1.32511800 |
| H | -2.76485300  | 1.40972500  | -0.70164700 |
| O | -3.06171600  | -1.26087800 | -2.38741500 |
| C | -8.87544900  | 0.78636100  | -0.20489000 |
| O | -9.19780300  | 1.94438600  | 0.05349700  |
| N | -9.74765400  | -0.28349300 | -0.14863600 |
| H | -9.36650700  | -1.19510300 | -0.38519000 |
| C | -11.10931500 | -0.29551800 | 0.19256700  |
| C | -11.76400400 | -1.54495900 | 0.16588600  |
| C | -11.83026000 | 0.86157600  | 0.55178100  |
| C | -13.11124900 | -1.64452300 | 0.49027400  |
| H | -11.20441300 | -2.44295200 | -0.11306600 |
| C | -13.17934700 | 0.74722200  | 0.87443000  |
| H | -11.32160200 | 1.82199300  | 0.57061200  |
| C | -13.83495600 | -0.49401800 | 0.84933000  |
| H | -13.61259900 | -2.61228200 | 0.46815300  |
| H | -13.75660900 | 1.62996900  | 1.15535500  |
| C | -15.27425700 | -0.53582300 | 1.20585500  |
| O | -15.94680600 | 0.43010300  | 1.52393000  |
| O | -15.79504100 | -1.79879100 | 1.14304300  |
| H | -16.73336600 | -1.69473800 | 1.39570200  |
| N | 6.50476900   | -0.58645100 | -2.13684700 |
| O | 5.53892800   | -1.38267800 | -1.71614900 |
| O | 7.63184000   | -0.65555800 | -1.69365600 |
| O | 6.17382900   | 0.23281500  | -3.04940100 |
| O | 3.19562400   | 2.84837400  | 1.09211500  |
| H | 2.35388400   | 2.48111000  | 1.42146300  |
| H | 3.66654200   | 3.34287600  | 1.85781200  |
| H | 4.76175200   | 0.33671700  | -3.09674200 |
| C | -4.76164300  | 0.04728800  | -1.33415200 |
| C | -5.23806600  | 1.33653900  | -1.03666000 |
| C | -5.65535300  | -1.03469400 | -1.29292500 |
| C | -6.57030200  | 1.53046600  | -0.68046500 |
| H | -4.58719200  | 2.21108700  | -1.12227600 |
| C | -6.98520300  | -0.83913400 | -0.92815600 |
| H | -5.27995200  | -2.02493100 | -1.55547200 |
| C | -7.46132900  | 0.44667300  | -0.61173300 |
| H | -6.96255000  | 2.52316700  | -0.45437000 |
| H | -7.63418400  | -1.71846000 | -0.90126800 |
| C | -3.35045500  | -0.25567300 | -1.74724600 |

#### Al-H<sub>2</sub>TDA final

0 1

|    |            |             |            |
|----|------------|-------------|------------|
| Al | 5.55742800 | -1.28975300 | 0.23182400 |
|----|------------|-------------|------------|

|    |              |             |             |
|----|--------------|-------------|-------------|
| Al | 5.39796000   | 1.94160600  | 0.14086600  |
| O  | 6.04053200   | 0.37242400  | -0.51330900 |
| O  | 7.41661600   | -1.46052600 | 0.64243600  |
| N  | 8.04717600   | -2.22536000 | 1.55158300  |
| O  | 9.23705600   | -2.04688600 | 1.69430600  |
| N  | 7.39542500   | 3.85094800  | -0.93508600 |
| O  | 8.43303000   | 4.00493100  | -1.52428900 |
| O  | 6.50022300   | 4.79288500  | -0.85268100 |
| O  | 4.29710600   | 4.68565200  | -2.33607600 |
| H  | 5.24169700   | 4.75774600  | -1.96878300 |
| O  | 7.37522600   | -3.07101300 | 2.19641500  |
| H  | 5.84790200   | -3.11595000 | 1.68325900  |
| O  | 5.69915500   | -2.03735600 | -1.49386000 |
| O  | 7.13828400   | 2.72070000  | -0.33127300 |
| O  | 4.87818100   | 2.61463900  | -1.76975700 |
| O  | 5.19455900   | -4.18040600 | -1.10037800 |
| O  | 5.34896000   | -0.41500600 | 2.08251200  |
| O  | 5.93728500   | 1.73667700  | 1.95361700  |
| N  | 5.85978400   | 0.60857800  | 2.64482700  |
| O  | 6.23410500   | 0.60478300  | 3.78996100  |
| H  | 6.95666300   | 0.36748600  | -0.83925900 |
| N  | 3.94095800   | 3.38231400  | -2.11747000 |
| O  | 2.80016800   | 3.08574000  | -2.31118200 |
| N  | 5.66902800   | -3.31961300 | -1.89018800 |
| O  | 6.08102200   | -3.56823900 | -3.00014200 |
| O  | 5.03647000   | -2.86909400 | 1.12838000  |
| H  | 4.95275600   | -3.56041000 | 0.39528700  |
| O  | 3.68628100   | -0.86136800 | -0.02008800 |
| C  | 3.05617300   | 0.23426600  | 0.19302800  |
| O  | 3.64839500   | 1.37013600  | 0.34848300  |
| C  | 1.59265300   | 0.21325700  | 0.27733400  |
| C  | 0.90580700   | -0.99965900 | 0.47569200  |
| C  | 0.85804800   | 1.41122900  | 0.17329000  |
| C  | -0.48121900  | -1.03450100 | 0.55892300  |
| H  | 1.47052500   | -1.92640600 | 0.59136600  |
| C  | -0.52523900  | 1.38584100  | 0.24033800  |
| H  | 1.38801100   | 2.35180700  | 0.02210700  |
| C  | -1.21383800  | 0.16520000  | 0.43078300  |
| H  | -1.01133100  | -1.97069700 | 0.71493300  |
| H  | -1.09267600  | 2.31571600  | 0.14319200  |
| N  | -2.60733900  | 0.22323200  | 0.49379900  |
| H  | -3.00851600  | 1.14651400  | 0.34690300  |
| O  | -3.19664900  | -2.00315000 | 0.67456500  |
| C  | -9.13816500  | 0.68779500  | 0.86624200  |
| O  | -9.47844700  | 1.63957300  | 1.56461700  |
| N  | -10.00916800 | -0.06263600 | 0.09485500  |

|   |              |             |             |
|---|--------------|-------------|-------------|
| H | -9.58070100  | -0.74548700 | -0.52530800 |
| C | -11.40237800 | 0.05487900  | -0.02981800 |
| C | -12.04106400 | -0.81124000 | -0.94181000 |
| C | -12.16963900 | 0.97677700  | 0.71106200  |
| C | -13.41859800 | -0.76205500 | -1.11658200 |
| H | -11.44494900 | -1.52799200 | -1.51454300 |
| C | -13.54863100 | 1.01459800  | 0.52665500  |
| H | -11.67174600 | 1.64611700  | 1.40818300  |
| C | -14.18882600 | 0.15532800  | -0.38064900 |
| H | -13.90793500 | -1.43310500 | -1.82274900 |
| H | -14.16205500 | 1.72069600  | 1.08926400  |
| C | -15.66183800 | 0.25521500  | -0.52294900 |
| O | -16.37512500 | 1.03246100  | 0.08842300  |
| O | -16.16395400 | -0.63383500 | -1.43292900 |
| H | -17.12761700 | -0.47122200 | -1.43476400 |
| N | 2.14137400   | -3.80426700 | -1.47308500 |
| O | 2.22592700   | -3.93639200 | -0.25908400 |
| O | 1.70960400   | -4.56216000 | -2.30211300 |
| O | 2.61173200   | -2.56863600 | -2.00756800 |
| O | 4.80049900   | 3.72066900  | 0.70783200  |
| H | 4.79698300   | 3.80152800  | 1.67810000  |
| H | 5.46506900   | 4.37299600  | 0.30456600  |
| H | 2.95319700   | -2.07226400 | -1.21652700 |
| C | -4.95572600  | -0.38546300 | 0.68846500  |
| C | -5.37611800  | 0.89563400  | 1.09083400  |
| C | -5.92292400  | -1.35324300 | 0.37312000  |
| C | -6.73229000  | 1.20948200  | 1.14046900  |
| H | -4.65309400  | 1.64898400  | 1.41548700  |
| C | -7.27850600  | -1.03388200 | 0.40818600  |
| H | -5.58187300  | -2.35721400 | 0.11546300  |
| C | -7.69756600  | 0.25811000  | 0.77428100  |
| H | -7.07889100  | 2.18786900  | 1.47707000  |
| H | -8.00689000  | -1.81909400 | 0.18897400  |
| C | -3.51931100  | -0.82118300 | 0.62704500  |

### Mg-H<sub>2</sub>BPDC initial

|     |            |             |             |
|-----|------------|-------------|-------------|
| 0 1 |            |             |             |
| Mg  | 4.51733000 | -0.09304800 | -0.18397200 |
| O   | 2.96060000 | 1.36450000  | -0.35604400 |
| O   | 4.97070100 | 0.69323200  | 1.76611800  |
| O   | 3.93709900 | -0.88369800 | -2.04519400 |
| O   | 5.73377700 | 1.27604700  | -1.11530500 |
| O   | 0.18704600 | 1.83706600  | 0.88504100  |
| O   | 0.59663800 | 1.64298700  | -2.06203600 |
| O   | 7.32700600 | 2.07600900  | 0.20532100  |

|    |              |             |             |
|----|--------------|-------------|-------------|
| O  | -0.44536600  | 1.25935200  | -3.95448300 |
| O  | -2.38275400  | 0.79384300  | 2.20443000  |
| O  | 3.34235100   | -1.55066800 | 0.73805800  |
| O  | 1.47904800   | -0.54809700 | 1.35147900  |
| N  | 2.34057600   | -1.47263500 | 1.54570400  |
| N  | 2.86234800   | -1.50106400 | -2.32163800 |
| O  | 2.83263000   | -2.42616400 | -3.11950400 |
| O  | 2.21903700   | -2.27376300 | 2.46221400  |
| N  | -0.50605300  | 1.49387800  | -2.76110700 |
| O  | -1.60894600  | 1.61537600  | -2.13969300 |
| N  | 6.58604400   | 2.20500700  | -0.82465300 |
| O  | 6.66965800   | 3.19307100  | -1.54268300 |
| O  | 6.06868100   | -1.39841400 | -0.00506200 |
| Mg | 1.08102800   | 0.43673700  | -0.45054400 |
| O  | -0.68049500  | -0.61581000 | -0.55667400 |
| C  | -2.71805500  | -1.70006400 | -1.12840300 |
| C  | -3.37369000  | -2.66854700 | -1.91288500 |
| C  | -3.43724300  | -0.92063100 | -0.20647800 |
| C  | -4.74443900  | -2.85296000 | -1.77162200 |
| H  | -2.79935000  | -3.26480000 | -2.62284700 |
| C  | -4.81492300  | -1.09913100 | -0.08640500 |
| H  | -2.91869700  | -0.19236900 | 0.42551200  |
| C  | -5.48105400  | -2.05680700 | -0.87362000 |
| H  | -5.27632700  | -3.61169300 | -2.34806500 |
| H  | -5.36737200  | -0.50190900 | 0.64123700  |
| C  | -1.26613700  | -1.46643200 | -1.25557400 |
| O  | -7.37797900  | -3.47486600 | -0.92044700 |
| C  | -7.88414500  | -1.22689600 | -0.35604600 |
| C  | -9.09376500  | -1.57142600 | 0.27501400  |
| C  | -7.63447900  | 0.11876600  | -0.68689600 |
| C  | -10.02293200 | -0.58944400 | 0.60436800  |
| H  | -9.28020100  | -2.62439300 | 0.49357800  |
| C  | -8.57360500  | 1.10111100  | -0.37772300 |
| H  | -6.71596300  | 0.39221400  | -1.20880000 |
| C  | -9.76501000  | 0.75456200  | 0.27803000  |
| H  | -10.95399500 | -0.85006600 | 1.10833000  |
| H  | -8.40608700  | 2.14842000  | -0.63456000 |
| C  | -10.72502100 | 1.84916000  | 0.59587600  |
| O  | -10.55612800 | 3.02449500  | 0.32436300  |
| O  | -11.84106500 | 1.39692300  | 1.23716700  |
| H  | -12.38634500 | 2.19391500  | 1.38905300  |
| O  | 1.76367400   | -1.13612400 | -1.72284600 |
| C  | -6.94929800  | -2.33796600 | -0.73051200 |
| O  | -0.63868900  | -2.21261200 | -2.15269600 |
| H  | 0.33349400   | -1.94826100 | -2.14183900 |
| S  | 3.46349900   | 2.81476200  | -0.78573500 |

|   |             |             |             |
|---|-------------|-------------|-------------|
| C | 2.05985900  | 3.91474400  | -0.45944400 |
| H | 1.18418500  | 3.58610300  | -1.03251700 |
| H | 1.87612300  | 3.88874600  | 0.62164600  |
| H | 2.38574400  | 4.92114900  | -0.75919400 |
| C | 3.43851500  | 2.80984000  | -2.59757900 |
| H | 2.45316100  | 2.46109000  | -2.93476100 |
| H | 3.66142300  | 3.83521100  | -2.92448900 |
| H | 4.25338700  | 2.14063900  | -2.89514300 |
| S | 6.31432000  | -2.92372700 | 0.11534900  |
| C | 4.98857400  | -3.76339100 | -0.81606700 |
| H | 4.01845200  | -3.51173000 | -0.37040500 |
| H | 5.04714100  | -3.40657600 | -1.85214600 |
| H | 5.18713600  | -4.84366400 | -0.77351200 |
| C | 5.78697200  | -3.39468700 | 1.79670700  |
| H | 4.74331200  | -3.09138800 | 1.95200800  |
| H | 5.91874400  | -4.48139600 | 1.89921400  |
| H | 6.45316400  | -2.86981900 | 2.49306600  |
| N | -0.71698900 | 2.69031500  | 1.03109700  |
| O | -0.81362300 | 3.42167200  | 1.98572900  |
| N | 5.90294000  | 0.20954000  | 2.46627800  |
| O | 7.15758000  | 0.45814700  | 2.07904300  |
| H | 7.11806900  | 1.07812700  | 1.19859700  |
| O | 5.74529700  | -0.45347100 | 3.46469300  |
| S | -2.00060700 | -0.00985900 | 3.45130100  |
| C | -1.42484800 | -1.65591400 | 2.87346300  |
| H | -2.30148500 | -2.16906200 | 2.45778900  |
| H | -0.65390400 | -1.50904100 | 2.10670000  |
| H | -1.02479500 | -2.21732700 | 3.72932900  |
| C | -0.35702200 | 0.58980700  | 4.00879100  |
| H | -0.07259200 | 0.03013300  | 4.91134100  |
| H | 0.37849400  | 0.45271600  | 3.20621900  |
| H | -0.48179600 | 1.65419900  | 4.24376800  |
| O | -1.62734600 | 2.85895500  | 0.05276100  |
| H | -1.46786400 | 2.20640100  | -0.75731000 |

### Mg-H<sub>2</sub>BPDC TS

0 1

|    |             |             |             |
|----|-------------|-------------|-------------|
| Mg | -4.30882600 | -0.19377400 | -0.18946600 |
| O  | -2.82160600 | -1.60747900 | 0.35249100  |
| O  | -5.25788600 | -0.65392100 | 1.70752500  |
| O  | -2.70642700 | 0.07583000  | -1.58550400 |
| O  | -5.28469000 | -1.77386100 | -1.02352600 |
| O  | -0.14596400 | -1.20695300 | 1.53266400  |
| O  | -0.45943100 | -2.37067800 | -1.18938500 |
| O  | -7.44376600 | -1.49266000 | -0.58949300 |

|    |             |             |             |
|----|-------------|-------------|-------------|
| O  | 0.77100500  | -2.55401300 | -2.99968000 |
| O  | 2.38985600  | 0.13336100  | 2.10310900  |
| O  | -3.45634600 | 1.40116900  | 0.88151800  |
| O  | -1.26099300 | 1.18193700  | 0.76278600  |
| N  | -2.28455700 | 1.91750400  | 0.97746400  |
| N  | -2.89009600 | 1.00135000  | -2.52933100 |
| O  | -3.89381400 | 0.93088500  | -3.22158900 |
| O  | -2.15283600 | 3.10021400  | 1.28272200  |
| N  | 0.70499000  | -2.46572900 | -1.78998900 |
| O  | 1.74069100  | -2.48373100 | -1.04670900 |
| N  | -6.52150900 | -2.09512900 | -1.23808900 |
| O  | -6.78566100 | -2.97457100 | -2.04171100 |
| O  | -5.72366300 | 1.11174900  | -0.78437500 |
| Mg | -1.06612300 | -0.60595600 | -0.31504900 |
| O  | 0.55730800  | 0.24886400  | -1.19544400 |
| C  | 2.57424300  | 1.50991300  | -1.32245300 |
| C  | 3.20115100  | 2.71012200  | -1.71613100 |
| C  | 3.30408600  | 0.51275300  | -0.65562300 |
| C  | 4.54640000  | 2.90803300  | -1.43213600 |
| H  | 2.61817000  | 3.47769900  | -2.22603000 |
| C  | 4.65896500  | 0.71024600  | -0.39140700 |
| H  | 2.80074200  | -0.39289800 | -0.32162000 |
| C  | 5.29095800  | 1.90409400  | -0.78022400 |
| H  | 5.05054700  | 3.83916200  | -1.69606600 |
| H  | 5.21123100  | -0.05158300 | 0.16004800  |
| C  | 1.12934400  | 1.30269800  | -1.53956700 |
| O  | 7.05696500  | 3.37249300  | -0.20571000 |
| C  | 7.71786400  | 1.09785500  | -0.33697600 |
| C  | 8.84715000  | 1.29412600  | 0.47918500  |
| C  | 7.60753600  | -0.08420000 | -1.09391000 |
| C  | 9.83192700  | 0.31521700  | 0.56911400  |
| H  | 8.92662500  | 2.23074800  | 1.03381100  |
| C  | 8.60349400  | -1.05648000 | -1.02223100 |
| H  | 6.75355700  | -0.23034000 | -1.75737600 |
| C  | 9.71274300  | -0.86735500 | -0.18352700 |
| H  | 10.69996800 | 0.45588000  | 1.21368000  |
| H  | 8.54450500  | -1.97532000 | -1.60805400 |
| C  | 10.73748000 | -1.94840400 | -0.13559100 |
| O  | 10.68634100 | -2.98498900 | -0.77325300 |
| O  | 11.76512400 | -1.65824000 | 0.71319100  |
| H  | 12.36371500 | -2.42924600 | 0.65977600  |
| O  | -2.04501700 | 1.92040000  | -2.63089600 |
| C  | 6.71779300  | 2.21093000  | -0.42580900 |
| O  | 0.49182500  | 2.31443200  | -2.10307500 |
| H  | -0.47953300 | 2.06659300  | -2.21303000 |
| S  | -3.26262400 | -3.11707400 | 0.54520600  |

|   |             |             |             |
|---|-------------|-------------|-------------|
| C | -1.84347400 | -3.88768700 | 1.36983100  |
| H | -0.95397400 | -3.77892700 | 0.73723900  |
| H | -1.72175100 | -3.39119900 | 2.34036500  |
| H | -2.09779000 | -4.94589900 | 1.52285400  |
| C | -3.11474100 | -3.91449700 | -1.07974500 |
| H | -2.14213400 | -3.64991900 | -1.51658600 |
| H | -3.21282400 | -4.99654300 | -0.90861400 |
| H | -3.95608400 | -3.53941500 | -1.67383200 |
| S | -6.17768600 | 2.59210300  | -0.78180800 |
| C | -4.75124500 | 3.58687400  | -1.33087400 |
| H | -3.92390400 | 3.48512400  | -0.61706000 |
| H | -4.47414400 | 3.21894900  | -2.32712400 |
| H | -5.08545900 | 4.63204200  | -1.39842700 |
| C | -6.19600900 | 3.13006000  | 0.96126400  |
| H | -5.21607200 | 2.91475000  | 1.40762300  |
| H | -6.42101800 | 4.20591100  | 0.97754900  |
| H | -6.99912300 | 2.57244700  | 1.45850300  |
| N | 0.61336000  | -1.99157300 | 2.13439600  |
| O | 0.59886800  | -2.17595400 | 3.33030600  |
| N | -6.26737600 | -0.06289000 | 2.16654900  |
| O | -7.37179100 | -0.02625300 | 1.39874200  |
| H | -7.21616100 | -0.64103000 | 0.51945400  |
| O | -6.32628400 | 0.48075600  | 3.24438300  |
| S | 2.20159000  | 1.35473600  | 3.00298400  |
| C | 1.75502900  | 2.77189400  | 1.92053100  |
| H | 2.60846900  | 2.93810900  | 1.25095400  |
| H | 0.84612700  | 2.53197300  | 1.35171800  |
| H | 1.59737400  | 3.65770800  | 2.55251800  |
| C | 0.54817100  | 1.19601600  | 3.78908100  |
| H | -0.20202500 | 1.04591900  | 3.00199700  |
| H | 0.59278000  | 0.31562300  | 4.44176100  |
| H | 0.34438000  | 2.10239500  | 4.37662100  |
| O | 1.48495700  | -2.73251100 | 1.42558800  |
| H | 1.45173200  | -2.49636800 | 0.38821900  |

### Mg-H<sub>2</sub>BPDC final

0 1

|    |             |             |             |
|----|-------------|-------------|-------------|
| Mg | -2.77286300 | -0.99504900 | 0.21536000  |
| O  | -2.38841900 | 0.86291500  | 1.24448700  |
| O  | -4.89652700 | -0.48496300 | 0.39891600  |
| O  | -0.69014200 | -4.62912600 | -0.44571000 |
| O  | -2.83555900 | -1.77421200 | 2.10921800  |
| O  | -2.52602700 | 3.78780200  | 0.60911900  |
| O  | 0.02984200  | 2.59364900  | 1.63653600  |
| O  | -4.73654600 | -2.85450100 | 2.47445600  |



|    |             |             |             |
|----|-------------|-------------|-------------|
| O  | 2.19539100  | 2.87958700  | 1.75766400  |
| O  | -0.13964700 | 3.49300900  | -1.04123500 |
| O  | -2.91071100 | -0.23685800 | -1.72743100 |
| O  | -2.61609900 | 1.94800200  | -1.64238000 |
| N  | -2.82323800 | 0.88949400  | -2.32715300 |
| N  | -0.75952900 | -4.73637400 | 0.78140100  |
| O  | -1.02155900 | -5.72075700 | 1.42883800  |
| O  | -2.93612400 | 0.94446500  | -3.55280300 |
| N  | 1.07616300  | 3.30812800  | 1.59558700  |
| O  | 0.92657500  | 4.61146600  | 1.40481500  |
| N  | -3.68930300 | -2.29255600 | 2.93242100  |
| O  | -3.46927300 | -2.23705100 | 4.13597600  |
| O  | -3.25214000 | -2.80408000 | -0.58018900 |
| Mg | -1.33586900 | 2.19412000  | -0.00401500 |
| O  | -0.14758100 | 0.65057500  | -0.60784500 |
| C  | 1.54262400  | -1.00150400 | -0.55231100 |
| C  | 1.86172200  | -2.35812700 | -0.74213100 |
| C  | 2.56281300  | -0.03548600 | -0.57051600 |
| C  | 3.18469200  | -2.73741900 | -0.95256300 |
| H  | 1.07004800  | -3.10965300 | -0.74464200 |
| C  | 3.89149700  | -0.42321400 | -0.73719100 |
| H  | 2.29671200  | 1.01377200  | -0.43519900 |
| C  | 4.21476700  | -1.78005200 | -0.92771500 |
| H  | 3.44982000  | -3.77955100 | -1.13966900 |
| H  | 4.67943600  | 0.33207500  | -0.74493100 |
| C  | 0.12967300  | -0.55329900 | -0.34797300 |
| O  | 5.80825600  | -3.22787900 | -1.91693600 |
| C  | 6.77411000  | -1.50566100 | -0.60361400 |
| C  | 8.01407400  | -1.58096900 | -1.26428700 |
| C  | 6.68492500  | -0.82299600 | 0.62460100  |
| C  | 9.13740800  | -0.95572200 | -0.73147100 |
| H  | 8.06810700  | -2.14394700 | -2.19779600 |
| C  | 7.81346800  | -0.21444700 | 1.17107400  |
| H  | 5.73697200  | -0.79241600 | 1.16447200  |
| C  | 9.04032200  | -0.26742900 | 0.49161700  |
| H  | 10.09642700 | -0.99835100 | -1.24845900 |
| H  | 7.77061600  | 0.30953700  | 2.12743000  |
| C  | 10.20864400 | 0.41447900  | 1.11700800  |
| O  | 10.17831100 | 1.01685700  | 2.17530900  |
| O  | 11.34435900 | 0.29669800  | 0.37095500  |
| H  | 12.03119100 | 0.77456600  | 0.87648300  |
| O  | -0.48077600 | -3.59455500 | 1.53118200  |
| C  | 5.61459400  | -2.24537900 | -1.20340700 |
| O  | -0.73625200 | -1.40863100 | 0.06847400  |
| H  | -0.49289600 | -2.82004400 | 0.87334500  |
| S  | -2.74486600 | 0.84168500  | 2.79491300  |

|   |             |             |             |
|---|-------------|-------------|-------------|
| C | -2.78808900 | 2.58360000  | 3.29721000  |
| H | -1.83017400 | 3.07234800  | 3.08702200  |
| H | -3.59446600 | 3.06055000  | 2.72829900  |
| H | -3.02181300 | 2.58196100  | 4.37180500  |
| C | -1.20715600 | 0.33834700  | 3.61519400  |
| H | -0.38428100 | 0.95555000  | 3.23292000  |
| H | -1.35584800 | 0.46621100  | 4.69648500  |
| H | -1.08544000 | -0.72466400 | 3.38070000  |
| S | -3.25652800 | -3.57074100 | -1.92687100 |
| C | -1.84078200 | -2.97221800 | -2.91051700 |
| H | -1.93612300 | -1.89029500 | -3.06008700 |
| H | -0.94437700 | -3.22773700 | -2.33570500 |
| H | -1.85126700 | -3.52101300 | -3.86299800 |
| C | -4.57990500 | -2.79938800 | -2.91915800 |
| H | -4.38269400 | -1.72284600 | -3.00274400 |
| H | -4.59662200 | -3.28506900 | -3.90514200 |
| H | -5.52289300 | -2.98994400 | -2.39188500 |
| N | -2.35909300 | 5.05161100  | 0.45333500  |
| O | -3.25280800 | 5.75336800  | 0.00235300  |
| N | -5.80992900 | -1.17795000 | -0.11599800 |
| O | -5.99479400 | -2.41897600 | 0.36795800  |
| H | -5.31811900 | -2.55121700 | 1.18661800  |
| O | -6.53791000 | -0.82103300 | -1.01299100 |
| S | -0.00302100 | 4.12218200  | -2.44753600 |
| C | -0.03748700 | 2.74284200  | -3.64317200 |
| H | 0.72262200  | 2.02808900  | -3.30257600 |
| H | -1.03208100 | 2.27864400  | -3.67175300 |
| H | 0.23960900  | 3.14913700  | -4.62642400 |
| C | -1.62559800 | 4.84862800  | -2.84851400 |
| H | -1.58994800 | 5.19852900  | -3.89014000 |
| H | -2.39859800 | 4.08173200  | -2.70413900 |
| H | -1.77822500 | 5.69907900  | -2.17194500 |
| O | -1.23589900 | 5.58444800  | 0.79782000  |
| H | -0.11718800 | 4.85037200  | 1.14380900  |

### Mg-H<sub>2</sub>ODA initial

0 1

|    |             |             |             |
|----|-------------|-------------|-------------|
| Mg | -5.58391600 | 0.62865200  | -0.26707800 |
| O  | -4.39740800 | -1.14278500 | -0.44488500 |
| O  | -6.28975900 | -0.09855100 | 1.63172000  |
| O  | -4.75052700 | 1.33340200  | -2.06361500 |
| O  | -7.03868500 | -0.39085500 | -1.30034500 |
| O  | -1.86480700 | -2.28921100 | 0.87748900  |
| O  | -2.08527000 | -1.89369000 | -2.06804600 |
| O  | -8.82881900 | -0.84519100 | -0.07098800 |

|    |             |             |             |
|----|-------------|-------------|-------------|
| O  | -0.91232700 | -1.70145400 | -3.91220000 |
| O  | 0.80815600  | -1.91278600 | 2.40754600  |
| O  | -4.15586400 | 1.74755000  | 0.76532800  |
| O  | -2.62119800 | 0.30704800  | 1.41393000  |
| N  | -3.24932800 | 1.40187600  | 1.61472000  |
| N  | -3.54913000 | 1.69459900  | -2.26667800 |
| O  | -3.26930900 | 2.61885200  | -3.01585700 |
| O  | -2.99610500 | 2.11513400  | 2.57601700  |
| N  | -0.95037600 | -1.97282100 | -2.72566700 |
| O  | 0.07412700  | -2.34927500 | -2.07317600 |
| N  | -8.09447500 | -1.10530000 | -1.08099100 |
| O  | -8.37435400 | -2.01922500 | -1.84601300 |
| O  | -6.80898100 | 2.24572400  | -0.08799400 |
| Mg | -2.35174900 | -0.66729800 | -0.42044800 |
| O  | -0.40068400 | -0.04639400 | -0.38854700 |
| C  | 1.85790800  | 0.56197900  | -0.79741800 |
| C  | 2.77047100  | 1.37409700  | -1.49546200 |
| C  | 2.32932900  | -0.39669300 | 0.12006300  |
| C  | 4.13969700  | 1.24512700  | -1.28780100 |
| H  | 2.39620900  | 2.10875300  | -2.20940300 |
| C  | 3.69389200  | -0.52868900 | 0.33440300  |
| H  | 1.62617700  | -1.02088400 | 0.68030000  |
| C  | 4.60779400  | 0.28510300  | -0.36624500 |
| H  | 4.85519400  | 1.86594700  | -1.82300300 |
| H  | 4.05894000  | -1.27229600 | 1.04789300  |
| C  | 0.40970900  | 0.67165300  | -1.01212700 |
| N  | 5.96962700  | 0.09620100  | -0.10798600 |
| H  | 6.23992100  | -0.62667500 | 0.56831300  |
| O  | 7.06215400  | 1.64899900  | -1.46461000 |
| C  | 8.35259500  | 0.16512400  | -0.02837900 |
| O  | 8.33850400  | -0.73988600 | 0.80803900  |
| N  | 9.43205800  | 0.80407500  | -0.55782500 |
| H  | 9.16101300  | 1.52268700  | -1.23773000 |
| C  | 10.79545200 | 0.61045600  | -0.30177800 |
| C  | 11.71068500 | 1.42217500  | -1.00136400 |
| C  | 11.26428900 | -0.35174500 | 0.61502600  |
| C  | 13.07713500 | 1.27836700  | -0.79103600 |
| H  | 11.33912600 | 2.16590700  | -1.71125800 |
| C  | 12.63467100 | -0.48474900 | 0.81568800  |
| H  | 10.54932600 | -0.97395000 | 1.14962100  |
| C  | 13.55252600 | 0.32091700  | 0.12215000  |
| H  | 13.78595700 | 1.90563500  | -1.33182600 |
| H  | 13.02361000 | -1.22236100 | 1.51986600  |
| C  | 14.99900600 | 0.12221500  | 0.38796600  |
| O  | 15.46324000 | -0.69138100 | 1.16830700  |
| O  | 15.78892600 | 0.96258100  | -0.34615200 |

|   |             |             |             |
|---|-------------|-------------|-------------|
| H | 16.70345500 | 0.73676600  | -0.08581200 |
| O | -2.59575000 | 1.06158600  | -1.64558600 |
| C | 7.04970300  | 0.73943500  | -0.63294300 |
| O | 0.02125100  | 1.57585600  | -1.90320300 |
| H | -0.98214700 | 1.54064700  | -1.95365200 |
| S | -5.19645500 | -2.42166100 | -0.96010700 |
| C | -4.09595100 | -3.82511600 | -0.63461300 |
| H | -3.14364800 | -3.68410600 | -1.16040200 |
| H | -3.95937500 | -3.88037300 | 0.45234200  |
| H | -4.62801500 | -4.71875200 | -0.99124900 |
| C | -5.08769400 | -2.35503800 | -2.76768500 |
| H | -4.03434900 | -2.22906200 | -3.05203200 |
| H | -5.52294300 | -3.28888700 | -3.15036700 |
| H | -5.71406500 | -1.50588400 | -3.06266200 |
| S | -6.70578600 | 3.78162600  | 0.09023400  |
| C | -5.17979600 | 4.32698600  | -0.74900400 |
| H | -4.31505000 | 3.84617600  | -0.27560100 |
| H | -5.26573300 | 4.02732200  | -1.80115200 |
| H | -5.13099400 | 5.42208000  | -0.66742800 |
| C | -6.16777000 | 4.06110200  | 1.81061100  |
| H | -5.22901600 | 3.52190100  | 1.99354400  |
| H | -6.05417700 | 5.14494900  | 1.95619500  |
| H | -6.96881200 | 3.67891200  | 2.45594500  |
| N | -1.16996500 | -3.32178300 | 1.01287200  |
| O | -1.28136700 | -4.10056700 | 1.92757400  |
| N | -7.11670300 | 0.56179500  | 2.31935000  |
| O | -8.37647400 | 0.62285100  | 1.87731200  |
| H | -8.44033900 | 0.04204900  | 0.97179900  |
| O | -6.85642100 | 1.13492800  | 3.35148800  |
| S | 0.52016300  | -1.07434900 | 3.65678600  |
| C | 0.35696400  | 0.67092700  | 3.10719900  |
| H | 1.35292600  | 0.99176100  | 2.77593900  |
| H | -0.36407400 | 0.71311100  | 2.28139100  |
| H | 0.01935400  | 1.28464700  | 3.95396200  |
| C | -1.24889700 | -1.31608100 | 4.08404100  |
| H | -1.47092000 | -0.72824300 | 4.98619100  |
| H | -1.87869900 | -1.00534400 | 3.24116100  |
| H | -1.37158600 | -2.38732700 | 4.28679100  |
| O | -0.26240300 | -3.63354400 | 0.06770200  |
| H | -0.24704800 | -2.93471300 | -0.72016800 |

### Mg-H<sub>2</sub>ODA TS

0 1

|    |            |             |             |
|----|------------|-------------|-------------|
| Mg | 5.33416900 | -0.22820900 | -0.32299400 |
| O  | 4.13432400 | 0.84607900  | 1.11662100  |

|    |              |             |             |
|----|--------------|-------------|-------------|
| O  | 6.31007700   | -1.00899600 | 1.50880300  |
| O  | 3.77335700   | 0.71110000  | -1.40587600 |
| O  | 6.57195500   | 1.38615900  | -0.25392400 |
| O  | 1.16572000   | 0.44591300  | 1.91978600  |
| O  | 2.05810500   | 2.86991100  | 0.53847800  |
| O  | 8.64590700   | 0.60434500  | -0.09214100 |
| O  | 1.17923500   | 4.41034500  | -0.75645900 |
| O  | -1.48077300  | -0.97481300 | 2.36637600  |
| O  | 4.18786500   | -1.96733100 | -0.18060200 |
| O  | 2.11361100   | -1.24408900 | 0.05467900  |
| N  | 2.92658500   | -2.20167000 | -0.18317700 |
| N  | 3.75266300   | 0.85591400  | -2.73271000 |
| O  | 4.63946600   | 0.29668700  | -3.37625400 |
| O  | 2.51155400   | -3.33601400 | -0.40883300 |
| N  | 1.02756100   | 3.52853700  | 0.06481100  |
| O  | -0.12478800  | 3.20374300  | 0.51224800  |
| N  | 7.85440000   | 1.58608300  | -0.28194100 |
| O  | 8.27918400   | 2.71544400  | -0.47391600 |
| O  | 6.60019900   | -1.29642000 | -1.47493200 |
| Mg | 2.27803400   | 0.85063200  | 0.12010900  |
| O  | 0.78071200   | 0.94001100  | -1.19652100 |
| C  | -1.55889800  | 0.79202700  | -1.66462100 |
| C  | -2.58693300  | 0.95759100  | -2.61256200 |
| C  | -1.88278700  | 0.43283600  | -0.34371000 |
| C  | -3.91842000  | 0.77603400  | -2.25547900 |
| H  | -2.33255900  | 1.23784900  | -3.63534600 |
| C  | -3.20633300  | 0.24160800  | 0.02257700  |
| H  | -1.10833000  | 0.27104800  | 0.40564300  |
| C  | -4.23314500  | 0.41808300  | -0.92665500 |
| H  | -4.72081000  | 0.90650500  | -2.97863500 |
| H  | -3.42482400  | -0.05332800 | 1.05217400  |
| C  | -0.15180700  | 0.99581800  | -2.01641300 |
| N  | -5.54849700  | 0.21994300  | -0.49530000 |
| H  | -5.70263400  | -0.02788200 | 0.48855100  |
| O  | -6.86176300  | 0.58752600  | -2.38817300 |
| C  | -7.91421900  | -0.00264300 | -0.27302800 |
| O  | -7.76368000  | -0.28845800 | 0.91599300  |
| N  | -9.07736100  | 0.09154400  | -0.97482400 |
| H  | -8.91837100  | 0.34607500  | -1.95559600 |
| C  | -10.39533600 | -0.10790600 | -0.54460900 |
| C  | -11.42208900 | 0.05560700  | -1.49593600 |
| C  | -10.71346500 | -0.45959400 | 0.78253300  |
| C  | -12.75054900 | -0.12933800 | -1.13118900 |
| H  | -11.16717700 | 0.32918800  | -2.52323000 |
| C  | -12.04745800 | -0.64169500 | 1.13357400  |
| H  | -9.91332000  | -0.58256900 | 1.50969900  |

|   |              |             |             |
|---|--------------|-------------|-------------|
| C | -13.07583600 | -0.48096600 | 0.19061800  |
| H | -13.54554700 | -0.00299200 | -1.86628100 |
| H | -12.32056100 | -0.91423400 | 2.15452600  |
| C | -14.47508600 | -0.69203700 | 0.63784800  |
| O | -14.81101200 | -0.99821400 | 1.76912200  |
| O | -15.38234900 | -0.50579600 | -0.36778500 |
| H | -16.25197800 | -0.67058000 | 0.04661200  |
| O | 2.86566900   | 1.56445400  | -3.22977600 |
| C | -6.71330900  | 0.30870100  | -1.19686700 |
| O | 0.10257200   | 1.25776200  | -3.29671800 |
| H | 1.08704800   | 1.39288400  | -3.35941600 |
| S | 4.86312800   | 1.81229400  | 2.13557200  |
| C | 3.57529300   | 2.18849700  | 3.35708500  |
| H | 2.74309700   | 2.70027400  | 2.85654700  |
| H | 3.26053700   | 1.23559900  | 3.80031000  |
| H | 4.02974200   | 2.82765100  | 4.12684200  |
| C | 4.98148700   | 3.44038600  | 1.33733200  |
| H | 4.00171200   | 3.70287200  | 0.91540500  |
| H | 5.30133300   | 4.14654000  | 2.11780200  |
| H | 5.75155600   | 3.34264200  | 0.56293800  |
| S | 6.71545800   | -2.60469000 | -2.29290600 |
| C | 5.11148000   | -2.89973200 | -3.11383900 |
| H | 4.33584800   | -3.09138200 | -2.36232900 |
| H | 4.89137000   | -1.99450900 | -3.69324700 |
| H | 5.24526400   | -3.76255200 | -3.78191900 |
| C | 6.61895100   | -3.96330000 | -1.07879300 |
| H | 5.70546500   | -3.83391800 | -0.48295100 |
| H | 6.61017500   | -4.91392500 | -1.63060600 |
| H | 7.51875700   | -3.89894400 | -0.45469700 |
| N | 0.60684900   | 0.96324300  | 2.91352200  |
| O | 0.68677800   | 0.53743800  | 4.04225900  |
| N | 7.19839600   | -1.89323100 | 1.54859000  |
| O | 8.32957500   | -1.67404500 | 0.84972300  |
| H | 8.27688200   | -0.69329200 | 0.42018700  |
| O | 7.12574300   | -2.93248300 | 2.16296400  |
| S | -1.17714400  | -2.47544800 | 2.31002500  |
| C | -0.88630800  | -2.91082900 | 0.54912000  |
| H | -1.82792000  | -2.71801800 | 0.01938700  |
| H | -0.07231800  | -2.29505100 | 0.14479100  |
| H | -0.62821300  | -3.97744900 | 0.48827900  |
| C | 0.56242600   | -2.69778800 | 2.85257700  |
| H | 1.20265900   | -2.03440300 | 2.25815400  |
| H | 0.59948500   | -2.41543500 | 3.91172600  |
| H | 0.84135200   | -3.75300800 | 2.72365500  |
| O | -0.12162500  | 2.07596900  | 2.73505300  |
| H | -0.05231400  | 2.42024400  | 1.72083300  |

## Mg-H<sub>2</sub>ODA final

0 1

|    |             |             |             |
|----|-------------|-------------|-------------|
| Mg | 3.30852200  | -1.54103800 | -0.01291100 |
| O  | 3.83165800  | 0.23859100  | -1.11552400 |
| O  | 5.46898800  | -1.88639200 | 0.15389300  |
| O  | -0.07457000 | -4.06956700 | 0.32952100  |
| O  | 3.35237300  | -2.42884200 | -1.86098900 |
| O  | 4.98947600  | 2.91985200  | -0.50102500 |
| O  | 2.35754100  | 2.73523200  | -1.92437000 |
| O  | 4.72773400  | -4.16694600 | -1.89688300 |
| O  | 0.52243300  | 3.82312000  | -2.40911900 |
| O  | 2.44490800  | 3.68205000  | 0.74077000  |
| O  | 3.43986500  | -0.74668900 | 1.91736100  |
| O  | 4.02434800  | 1.37440400  | 1.75414400  |
| N  | 3.70972300  | 0.37009400  | 2.47865400  |
| N  | 0.13962900  | -4.28065100 | -0.86735500 |
| O  | 0.10675300  | -5.33584400 | -1.45335200 |
| O  | 3.66188000  | 0.46980800  | 3.70597900  |
| N  | 1.68002400  | 3.79736600  | -2.06092000 |
| O  | 2.29506000  | 4.95366000  | -1.84872800 |
| N  | 4.05491100  | -3.28755800 | -2.52671400 |
| O  | 4.05428800  | -3.24098100 | -3.75078000 |
| O  | 2.94471600  | -3.33457000 | 0.87617900  |
| Mg | 3.18994600  | 1.95604300  | -0.07619500 |
| O  | 1.42801600  | 1.02547800  | 0.32950000  |
| C  | -0.73639700 | 0.12753200  | 0.03393600  |
| C  | -1.58062100 | -0.98925400 | 0.15148400  |
| C  | -1.30681600 | 1.40749300  | -0.09560200 |
| C  | -2.96665900 | -0.84726000 | 0.14448900  |
| H  | -1.15081100 | -1.98560100 | 0.26867800  |
| C  | -2.68660600 | 1.56144000  | -0.12361400 |
| H  | -0.64750100 | 2.27110500  | -0.19232600 |
| C  | -3.52757400 | 0.43635400  | -0.00076400 |
| H  | -3.62237600 | -1.70981400 | 0.24592100  |
| H  | -3.12661500 | 2.55469500  | -0.24630800 |
| C  | 0.74739900  | -0.00328200 | 0.05317300  |
| N  | -4.91043500 | 0.65472200  | -0.02995200 |
| H  | -5.25097900 | 1.61572800  | -0.14410700 |
| O  | -5.85639200 | -1.46418600 | 0.21381400  |
| C  | -7.28919600 | 0.49058400  | -0.02124800 |
| O  | -7.36182400 | 1.71388200  | -0.15611500 |
| N  | -8.30815500 | -0.40737500 | 0.07011600  |
| H  | -7.96695400 | -1.36883700 | 0.17793100  |
| C  | -9.69178600 | -0.19187400 | 0.03567400  |

|   |              |             |             |
|---|--------------|-------------|-------------|
| C | -10.52907100 | -1.31972600 | 0.14854500  |
| C | -10.25438200 | 1.09251000  | -0.10539700 |
| C | -11.91089300 | -1.17129000 | 0.12159300  |
| H | -10.08493600 | -2.31277700 | 0.25674400  |
| C | -11.63907500 | 1.22630900  | -0.13064100 |
| H | -9.59887700  | 1.95668900  | -0.19259500 |
| C | -12.47964300 | 0.10678600  | -0.01843100 |
| H | -12.55953300 | -2.04310900 | 0.20841200  |
| H | -12.10013000 | 2.20962000  | -0.23902500 |
| C | -13.94699500 | 0.32683300  | -0.05349200 |
| O | -14.49043100 | 1.41176900  | -0.17180600 |
| O | -14.65591300 | -0.83611100 | 0.06312100  |
| H | -15.59340800 | -0.56246300 | 0.02613300  |
| O | 0.43342800   | -3.17441200 | -1.66063700 |
| C | -5.93012100  | -0.24220700 | 0.06998300  |
| O | 1.27539100   | -1.15221700 | -0.19761000 |
| H | 0.63998400   | -2.41353400 | -1.01606700 |
| S | 4.37367200   | -0.03319800 | -2.58583700 |
| C | 5.15980900   | 1.51882900  | -3.09806400 |
| H | 4.44518400   | 2.34845100  | -3.05662200 |
| H | 5.99395400   | 1.69662600  | -2.40958800 |
| H | 5.53078000   | 1.34661700  | -4.11889800 |
| C | 2.89784100   | 0.02419500  | -3.63899700 |
| H | 2.33342000   | 0.93665200  | -3.40856300 |
| H | 3.23928500   | -0.00171200 | -4.68321400 |
| H | 2.33964900   | -0.88968100 | -3.40854100 |
| S | 2.44361700   | -3.93660100 | 2.21300300  |
| C | 1.23050900   | -2.77416800 | 2.92552400  |
| H | 1.71047500   | -1.80103100 | 3.08229600  |
| H | 0.41126800   | -2.71295100 | 2.20134600  |
| H | 0.87442400   | -3.21366500 | 3.86817100  |
| C | 3.78893900   | -3.64277600 | 3.41104500  |
| H | 4.00777400   | -2.56776500 | 3.44689600  |
| H | 3.46486200   | -4.02262200 | 4.39037200  |
| H | 4.65752500   | -4.21198400 | 3.05727600  |
| N | 5.32213400   | 4.15505600  | -0.39377600 |
| O | 6.36771700   | 4.48015600  | 0.15010000  |
| N | 5.95703200   | -2.83281000 | 0.82118000  |
| O | 5.72778600   | -4.08342600 | 0.38384300  |
| H | 5.18256300   | -4.01055300 | -0.53449800 |
| O | 6.61784800   | -2.71221700 | 1.82685200  |
| S | 2.39252400   | 4.43797700  | 2.08854200  |
| C | 1.74698000   | 3.25918600  | 3.32409700  |
| H | 0.81088800   | 2.86592200  | 2.90734200  |
| H | 2.46894500   | 2.45191000  | 3.50479300  |
| H | 1.54226700   | 3.82323000  | 4.24535500  |



|   |            |            |             |
|---|------------|------------|-------------|
| C | 4.10742500 | 4.53240500 | 2.69850900  |
| H | 4.08131100 | 4.95205100 | 3.71430100  |
| H | 4.53938800 | 3.52249600 | 2.68856100  |
| H | 4.65461900 | 5.20733600 | 2.02833900  |
| O | 4.54321100 | 5.06120500 | -0.88147000 |
| H | 3.29219800 | 4.78998400 | -1.41335500 |

**Mg-H<sub>2</sub>TDA initial**

0 1

|    |              |             |             |
|----|--------------|-------------|-------------|
| Mg | -6.95410500  | 0.50635400  | -0.10351400 |
| O  | -5.68795700  | -1.18268700 | -0.45166900 |
| O  | -7.52944900  | -0.38072400 | 1.77254400  |
| O  | -6.24901000  | 1.36667000  | -1.88608300 |
| O  | -8.40376600  | -0.52214500 | -1.13576000 |
| O  | -3.03689300  | -2.27207300 | 0.67348500  |
| O  | -3.42356200  | -1.70240400 | -2.22642200 |
| O  | -10.10553100 | -1.15414700 | 0.13980100  |
| O  | -2.35398000  | -1.32795800 | -4.10511000 |
| O  | -0.30408200  | -1.86334800 | 2.11768300  |
| O  | -5.53712100  | 1.63032700  | 0.93822200  |
| O  | -3.90156800  | 0.23480200  | 1.41581500  |
| N  | -4.57426800  | 1.27790200  | 1.72026400  |
| N  | -5.07951200  | 1.80824700  | -2.11715000 |
| O  | -4.88661900  | 2.79383000  | -2.81381600 |
| O  | -4.31204800  | 1.93744200  | 2.71691900  |
| N  | -2.32004200  | -1.67797500 | -2.93927200 |
| O  | -1.24704900  | -2.04219700 | -2.36195700 |
| N  | -9.40821600  | -1.30719300 | -0.91733000 |
| O  | -9.67620900  | -2.18450600 | -1.72819500 |
| O  | -8.24962400  | 2.03979600  | 0.23946000  |
| Mg | -3.67011400  | -0.59806900 | -0.49185500 |
| O  | -1.75738100  | 0.12291900  | -0.50721200 |
| C  | 0.44478100   | 0.88311300  | -0.96160300 |
| C  | 1.28542600   | 1.79273700  | -1.62892600 |
| C  | 1.00645500   | -0.11398000 | -0.14049600 |
| C  | 2.66765800   | 1.72554900  | -1.48753900 |
| H  | 0.84423600   | 2.55877500  | -2.26791200 |
| C  | 2.38319000   | -0.18570400 | 0.00602300  |
| H  | 0.36373900   | -0.81598700 | 0.39927100  |
| C  | 3.22827600   | 0.72531600  | -0.66432300 |
| H  | 3.32433500   | 2.42841900  | -1.99397800 |
| H  | 2.81301600   | -0.96267200 | 0.64530500  |
| C  | -1.01302500  | 0.92784300  | -1.10867700 |
| N  | 4.60728900   | 0.57049100  | -0.47733500 |
| H  | 4.86969500   | -0.18399800 | 0.15273900  |

|   |             |             |             |
|---|-------------|-------------|-------------|
| O | 5.48928400  | 2.38114900  | -1.60973100 |
| C | 11.03258300 | -0.42820200 | 0.36554100  |
| O | 11.19021800 | -1.44598300 | 1.03509800  |
| N | 12.07042000 | 0.34454100  | -0.13134700 |
| H | 11.80351800 | 1.08711800  | -0.77316900 |
| C | 13.45296000 | 0.17995500  | 0.03994500  |
| C | 14.29750800 | 1.08306600  | -0.63951600 |
| C | 14.01713000 | -0.82343200 | 0.85425900  |
| C | 15.67808100 | 0.99123000  | -0.51360800 |
| H | 13.85892100 | 1.86209600  | -1.27026200 |
| C | 15.40149900 | -0.90305300 | 0.97239000  |
| H | 13.36221200 | -1.52177800 | 1.36941400  |
| C | 16.24607600 | -0.00683200 | 0.29758300  |
| H | 16.32638900 | 1.69097700  | -1.04137300 |
| H | 15.85908000 | -1.67238800 | 1.59702500  |
| C | 17.71091300 | -0.15480800 | 0.47205000  |
| O | 18.25503400 | -1.00064700 | 1.16171800  |
| O | 18.42241400 | 0.77574500  | -0.23506600 |
| H | 19.35828500 | 0.57367200  | -0.03932000 |
| O | -4.06520400 | 1.19160800  | -1.58323700 |
| O | -1.48958700 | 1.87038400  | -1.91405100 |
| H | -2.49011200 | 1.78199100  | -1.92522900 |
| S | -6.44454100 | -2.46739100 | -1.01389900 |
| C | -5.25919800 | -3.82727000 | -0.83296800 |
| H | -4.34283500 | -3.60240800 | -1.39245400 |
| H | -5.06544100 | -3.94339800 | 0.24041800  |
| H | -5.76259500 | -4.72395800 | -1.22209800 |
| C | -6.42817900 | -2.28053600 | -2.81637000 |
| H | -5.39765500 | -2.08139700 | -3.13982200 |
| H | -6.83473100 | -3.21006600 | -3.23904900 |
| H | -7.10986200 | -1.44877600 | -3.02585700 |
| S | -8.21552800 | 3.56412100  | 0.51621600  |
| C | -6.76137900 | 4.24419100  | -0.35174400 |
| H | -5.85126900 | 3.78092400  | 0.04852800  |
| H | -6.88285500 | 4.00989400  | -1.41690900 |
| H | -6.76432800 | 5.33265800  | -0.19838800 |
| C | -7.60997800 | 3.75918400  | 2.22572800  |
| H | -6.63770200 | 3.25982500  | 2.32926700  |
| H | -7.54391700 | 4.83570700  | 2.43913400  |
| H | -8.35873300 | 3.29348600  | 2.87894200  |
| N | -2.28244400 | -3.27056900 | 0.70865500  |
| O | -2.30749500 | -4.11100700 | 1.57395400  |
| N | -8.35510900 | 0.18789700  | 2.53905300  |
| O | -9.63620800 | 0.20916000  | 2.15882300  |
| H | -9.71402700 | -0.31515100 | 1.22044400  |
| O | -8.07523700 | 0.70626800  | 3.59479900  |

|   |             |             |             |
|---|-------------|-------------|-------------|
| S | -0.58135800 | -1.10301700 | 3.41839400  |
| C | -0.86438200 | 0.65445300  | 2.96544000  |
| H | 0.09756300  | 1.04936500  | 2.61437200  |
| H | -1.61834800 | 0.69399300  | 2.16947500  |
| H | -1.20363200 | 1.20478900  | 3.85404800  |
| C | -2.31319100 | -1.46543000 | 3.90836200  |
| H | -2.52514800 | -0.93604600 | 4.84834400  |
| H | -2.99736600 | -1.14943200 | 3.11106600  |
| H | -2.36787500 | -2.55056200 | 4.06075700  |
| O | -1.40664800 | -3.46991100 | -0.29508200 |
| H | -1.46889400 | -2.72450300 | -1.03768200 |
| C | 7.01920000  | 0.85317400  | -0.59380800 |
| C | 8.06079900  | 1.79432400  | -0.61244800 |
| C | 7.31388400  | -0.48660300 | -0.28148100 |
| C | 9.36509500  | 1.41048400  | -0.30855400 |
| H | 7.81667700  | 2.82728500  | -0.86556700 |
| C | 8.61817200  | -0.87013100 | 0.02329200  |
| H | 6.53572300  | -1.25402000 | -0.31106800 |
| C | 9.65985100  | 0.07076300  | 0.00356400  |
| H | 10.14446800 | 2.17672700  | -0.27878500 |
| H | 8.86159400  | -1.90295600 | 0.27755900  |
| C | 5.64758600  | 1.35337600  | -0.95583900 |

### Mg-H<sub>2</sub>ODA TS

0 1

|    |             |             |             |
|----|-------------|-------------|-------------|
| Mg | -6.59852000 | 0.15977000  | -0.12122000 |
| O  | -5.22052000 | 0.14744000  | 1.54510000  |
| O  | -7.32407000 | 2.00289000  | 0.88154000  |
| O  | -5.18115000 | -1.36580000 | -0.50861000 |
| O  | -7.81182000 | -0.93510000 | 1.09186000  |
| O  | -2.16106000 | 0.71915000  | 1.61996000  |
| O  | -3.23228000 | -1.95086000 | 2.16933000  |
| O  | -9.84754000 | -0.05765000 | 0.93591000  |
| O  | -2.53510000 | -4.02956000 | 2.04610000  |
| O  | 0.53292000  | 1.95233000  | 0.82383000  |
| O  | -5.45848000 | 1.49454000  | -1.25264000 |
| O  | -3.36907000 | 0.96801000  | -0.76363000 |
| N  | -4.20224000 | 1.61561000  | -1.48552000 |
| N  | -5.33544000 | -2.31269000 | -1.43732000 |
| O  | -6.32171000 | -2.22921000 | -2.16825000 |
| O  | -3.81210000 | 2.34794000  | -2.39112000 |
| N  | -2.27493000 | -2.84527000 | 2.11340000  |
| O  | -1.07263000 | -2.41170000 | 2.14203000  |
| N  | -9.08584000 | -1.00009000 | 1.33278000  |
| O  | -9.52905000 | -1.95657000 | 1.95067000  |

|    |             |             |             |
|----|-------------|-------------|-------------|
| O  | -8.01524000 | 0.35723000  | -1.54507000 |
| Mg | -3.50570000 | -0.62700000 | 0.59712000  |
| O  | -2.18014000 | -1.61952000 | -0.51002000 |
| C  | 0.08306000  | -1.96026000 | -1.19274000 |
| C  | 0.99590000  | -2.73903000 | -1.92961000 |
| C  | 0.55946000  | -0.88890000 | -0.41487000 |
| C  | 2.35969000  | -2.46889000 | -1.89198000 |
| H  | 0.62636000  | -3.57041000 | -2.53120000 |
| C  | 1.91447000  | -0.60540000 | -0.37491000 |
| H  | -0.12280000 | -0.24855000 | 0.14307000  |
| C  | 2.82948000  | -1.39505000 | -1.10352000 |
| H  | 3.07225000  | -3.07206000 | -2.44902000 |
| H  | 2.24558000  | 0.24878000  | 0.22262000  |
| C  | -1.35228000 | -2.23935000 | -1.20159000 |
| N  | 4.18152000  | -1.04777000 | -1.00443000 |
| H  | 4.37672000  | -0.29263000 | -0.35096000 |
| O  | 5.22170000  | -2.64983000 | -2.30271000 |
| C  | 10.45788000 | 0.79146000  | -0.49778000 |
| O  | 10.57936000 | 2.01277000  | -0.54936000 |
| N  | 11.48572000 | -0.07914000 | -0.17130000 |
| H  | 11.22023000 | -1.05298000 | -0.04599000 |
| C  | 12.82859000 | 0.20867000  | 0.11442000  |
| C  | 13.65499000 | -0.87483000 | 0.47998000  |
| C  | 13.37345000 | 1.50714000  | 0.04204000  |
| C  | 14.99869000 | -0.67286000 | 0.76964000  |
| H  | 13.23177000 | -1.88232000 | 0.53430000  |
| C  | 14.72124000 | 1.69486000  | 0.33365000  |
| H  | 12.73061000 | 2.33962000  | -0.23314000 |
| C  | 15.54745000 | 0.61966000  | 0.69860000  |
| H  | 15.63296000 | -1.51330000 | 1.05221000  |
| H  | 15.16331000 | 2.69163000  | 0.28427000  |
| C  | 16.97314000 | 0.89799000  | 0.99533000  |
| O  | 17.49933000 | 1.99717000  | 0.94960000  |
| O  | 17.66989000 | -0.22892000 | 1.33701000  |
| H  | 18.58024000 | 0.08382000  | 1.50571000  |
| O  | -4.50052000 | -3.22638000 | -1.48781000 |
| O  | -1.75984000 | -3.22175000 | -2.00307000 |
| H  | -2.74301000 | -3.29493000 | -1.86830000 |
| S  | -5.81006000 | 0.09894000  | 3.01231000  |
| C  | -4.37399000 | 0.47388000  | 4.05621000  |
| H  | -3.61359000 | -0.30501000 | 3.91453000  |
| H  | -4.00481000 | 1.46266000  | 3.75707000  |
| H  | -4.72342000 | 0.50347000  | 5.09763000  |
| C  | -6.02454000 | -1.65266000 | 3.44662000  |
| H  | -5.10840000 | -2.19941000 | 3.18450000  |
| H  | -6.23171000 | -1.68169000 | 4.52659000  |

|   |             |             |             |
|---|-------------|-------------|-------------|
| H | -6.89212000 | -2.00309000 | 2.87514000  |
| S | -8.24683000 | 0.85000000  | -2.99315000 |
| C | -6.77119000 | 0.41606000  | -3.97651000 |
| H | -5.89903000 | 0.96253000  | -3.59760000 |
| H | -6.63851000 | -0.66787000 | -3.87163000 |
| H | -6.98930000 | 0.67976000  | -5.02125000 |
| C | -7.98925000 | 2.65605000  | -2.95404000 |
| H | -7.00085000 | 2.85840000  | -2.52007000 |
| H | -8.06423000 | 3.03379000  | -3.98357000 |
| H | -8.79264000 | 3.07945000  | -2.33871000 |
| N | -1.48028000 | 0.88703000  | 2.65739000  |
| O | -1.41509000 | 1.92594000  | 3.27259000  |
| N | -8.20007000 | 2.78228000  | 0.43718000  |
| O | -9.41450000 | 2.26586000  | 0.16317000  |
| H | -9.41706000 | 1.23545000  | 0.45730000  |
| O | -8.04749000 | 3.96425000  | 0.23097000  |
| S | 0.18717000  | 3.08214000  | -0.15219000 |
| C | -0.33234000 | 2.30601000  | -1.73385000 |
| H | 0.53811000  | 1.75705000  | -2.11503000 |
| H | -1.17812000 | 1.62971000  | -1.55460000 |
| H | -0.61953000 | 3.10047000  | -2.43689000 |
| C | -1.47437000 | 3.71062000  | 0.30928000  |
| H | -2.17127000 | 2.86453000  | 0.35152000  |
| H | -1.37145000 | 4.17183000  | 1.29904000  |
| H | -1.78868000 | 4.45640000  | -0.43433000 |
| O | -0.78050000 | -0.15028000 | 3.14208000  |
| H | -0.98492000 | -1.04659000 | 2.58434000  |
| C | 6.59633000  | -0.98112000 | -1.28469000 |
| C | 7.75448000  | -1.75316000 | -1.46873000 |
| C | 6.72711000  | 0.36127000  | -0.88401000 |
| C | 9.01234000  | -1.21364000 | -1.20929000 |
| H | 7.63738000  | -2.77543000 | -1.83196000 |
| C | 7.98623000  | 0.90557000  | -0.64059000 |
| H | 5.85197000  | 1.01092000  | -0.79803000 |
| C | 9.14071000  | 0.11812000  | -0.77446000 |
| H | 9.89607000  | -1.83034000 | -1.39390000 |
| H | 8.10786000  | 1.95179000  | -0.35549000 |
| C | 5.28405000  | -1.64805000 | -1.59454000 |

### Mg-H<sub>2</sub>ODA final

0 1

|    |            |             |             |
|----|------------|-------------|-------------|
| Mg | 4.72951300 | -1.42559400 | -0.05731600 |
| O  | 5.04849900 | 0.40928800  | -1.14990300 |
| O  | 6.91667100 | -1.57346400 | 0.05099900  |
| O  | 1.59680100 | -4.25694400 | 0.28959900  |

|    |              |             |             |
|----|--------------|-------------|-------------|
| O  | 4.81078500   | -2.28421500 | -1.91830300 |
| O  | 5.95814700   | 3.19649600  | -0.53774400 |
| O  | 3.30736000   | 2.75217700  | -1.86773200 |
| O  | 6.34822800   | -3.87760300 | -2.02272800 |
| O  | 1.35460500   | 3.65684600  | -2.26057300 |
| O  | 3.42619000   | 3.69164200  | 0.80016500  |
| O  | 4.84568400   | -0.65238000 | 1.88321800  |
| O  | 5.23937600   | 1.51282900  | 1.72863200  |
| N  | 5.03057400   | 0.47869500  | 2.44958200  |
| N  | 1.78149200   | -4.40802100 | -0.92098400 |
| O  | 1.81553000   | -5.44156200 | -1.54456700 |
| O  | 5.00344800   | 0.56355700  | 3.67892000  |
| N  | 2.52485900   | 3.74384300  | -1.96645000 |
| O  | 3.03300000   | 4.95350600  | -1.77597400 |
| N  | 5.57703500   | -3.05711400 | -2.61798300 |
| O  | 5.54070000   | -2.98826800 | -3.84062900 |
| O  | 4.55937300   | -3.25973300 | 0.80667400  |
| Mg | 4.28886400   | 2.04378300  | -0.06132400 |
| O  | 2.64093300   | 0.94903100  | 0.40358900  |
| C  | 0.55583000   | -0.12504100 | 0.12785100  |
| C  | -0.19168500  | -1.30935100 | 0.23813900  |
| C  | -0.12417600  | 1.10358400  | 0.03326200  |
| C  | -1.58498200  | -1.28683100 | 0.25920200  |
| H  | 0.32118500   | -2.26869500 | 0.32834200  |
| C  | -1.51146000  | 1.13828900  | 0.03009000  |
| H  | 0.45613100   | 2.02242800  | -0.06029900 |
| C  | -2.25820000  | -0.05402400 | 0.14577900  |
| H  | -2.16247000  | -2.20197600 | 0.36505200  |
| H  | -2.03184400  | 2.09550700  | -0.07003100 |
| C  | 2.04341400   | -0.12809700 | 0.11505100  |
| N  | -3.65532600  | 0.06192800  | 0.12740900  |
| H  | -4.00547400  | 1.01416400  | 0.05492300  |
| O  | -4.35427200  | -2.10144400 | 0.53844700  |
| C  | -10.16530500 | 0.78039000  | -0.14565200 |
| O  | -10.42217400 | 1.96028300  | -0.37201400 |
| N  | -11.12322600 | -0.21012700 | 0.00134100  |
| H  | -10.77186000 | -1.16286100 | 0.06027000  |
| C  | -12.52129000 | -0.09665900 | -0.02893400 |
| C  | -13.26607700 | -1.28960500 | 0.08303700  |
| C  | -13.19436900 | 1.13600100  | -0.15384300 |
| C  | -14.65505800 | -1.25958400 | 0.07034900  |
| H  | -12.74303900 | -2.24559600 | 0.18092500  |
| C  | -14.58594600 | 1.15153900  | -0.16373900 |
| H  | -12.61564300 | 2.05152600  | -0.24795300 |
| C  | -15.33148900 | -0.03324200 | -0.05313900 |
| H  | -15.22613000 | -2.18422800 | 0.15624100  |

|   |              |             |             |
|---|--------------|-------------|-------------|
| H | -15.12708300 | 2.09457200  | -0.26008300 |
| C | -16.81095100 | 0.06313400  | -0.07213900 |
| O | -17.44666000 | 1.09851400  | -0.17679300 |
| O | -17.41974900 | -1.15670500 | 0.04251900  |
| H | -18.37667600 | -0.96013500 | 0.01656200  |
| O | 1.94980600   | -3.25406300 | -1.68246500 |
| O | 2.66462900   | -1.22020700 | -0.17599000 |
| H | 2.11282700   | -2.50015000 | -1.01667700 |
| S | 5.55679500   | 0.20838800  | -2.64364800 |
| C | 6.16162200   | 1.83763400  | -3.16223700 |
| H | 5.37009100   | 2.59078800  | -3.07942400 |
| H | 7.00107900   | 2.09075100  | -2.50447000 |
| H | 6.50644800   | 1.71556400  | -4.19932700 |
| C | 4.04220800   | 0.12768400  | -3.63904200 |
| H | 3.39902600   | 0.97640300  | -3.37404100 |
| H | 4.34343000   | 0.14715400  | -4.69569900 |
| H | 3.58736600   | -0.83992700 | -3.40087200 |
| S | 4.13042800   | -3.92282100 | 2.13968000  |
| C | 2.82945800   | -2.88143700 | 2.88313000  |
| H | 3.22453400   | -1.87217200 | 3.04828900  |
| H | 1.99952400   | -2.88209700 | 2.16855500  |
| H | 2.52461100   | -3.36299400 | 3.82316800  |
| C | 5.46145800   | -3.52825600 | 3.32471700  |
| H | 5.58584300   | -2.43875500 | 3.37288500  |
| H | 5.18643700   | -3.94836600 | 4.30259900  |
| H | 6.37152100   | -4.01356600 | 2.95064100  |
| N | 6.15149400   | 4.45854600  | -0.40410200 |
| O | 7.13958300   | 4.88706800  | 0.17477100  |
| N | 7.50121000   | -2.47968800 | 0.69612500  |
| O | 7.38529700   | -3.73924800 | 0.24006400  |
| H | 6.81694500   | -3.70346900 | -0.66577000 |
| O | 8.16195200   | -2.31312600 | 1.69527300  |
| S | 3.29772000   | 4.38037400  | 2.17877800  |
| C | 2.76233500   | 3.09417600  | 3.35932300  |
| H | 1.88896900   | 2.61059200  | 2.90304300  |
| H | 3.56748400   | 2.36869700  | 3.53512400  |
| H | 2.47258800   | 3.59941800  | 4.29173900  |
| C | 4.99507100   | 4.60964000  | 2.80143700  |
| H | 4.92791900   | 4.99516200  | 3.82887400  |
| H | 5.51556100   | 3.64314300  | 2.76293500  |
| H | 5.48296900   | 5.34871700  | 2.15323600  |
| O | 5.29638200   | 5.28199300  | -0.90953500 |
| H | 4.06451900   | 4.89006100  | -1.38752500 |
| C | -6.03255600  | -0.44204700 | 0.16620000  |
| C | -7.02551300  | -1.22548200 | 0.77539900  |
| C | -6.41265400  | 0.70927200  | -0.54749800 |

|   |             |             |             |
|---|-------------|-------------|-------------|
| C | -8.36661900 | -0.85747300 | 0.69057700  |
| H | -6.71487400 | -2.12087600 | 1.31621400  |
| C | -7.75358600 | 1.07790400  | -0.63125500 |
| H | -5.66990700 | 1.30944500  | -1.08001500 |
| C | -8.74647900 | 0.29448300  | -0.02197400 |
| H | -9.11048500 | -1.45840300 | 1.22063900  |
| H | -8.06396500 | 1.97340700  | -1.17200500 |
| C | -4.61382300 | -0.92612400 | 0.29302800  |

### Section S3: Electronic structure

The total DOS of all MOFs and the partial DOS of ions surrounding the Fermi energy  $E_F$  are examined, as displayed in Figure S1. The valence and conduction band of these MOFs shows mainly orbitals contributions from linkers. PDOS of Al, Mg metal; and OH, DMSO axial molecules in these MOFs reveal that their orbitals occupy below -1.00 eV; i.e they do not affect on the physical properties of these MOFs. The band gap of these MOFs are from 2.25 eV to 2.58 eV as shown in Figure S2, indicating that these belong to the semiconductor. The band structure of these MOFs are flat and featureless which have also been witnessed in that of IRMOF-1 series, which could be explained by the weak orbital hybridizations.



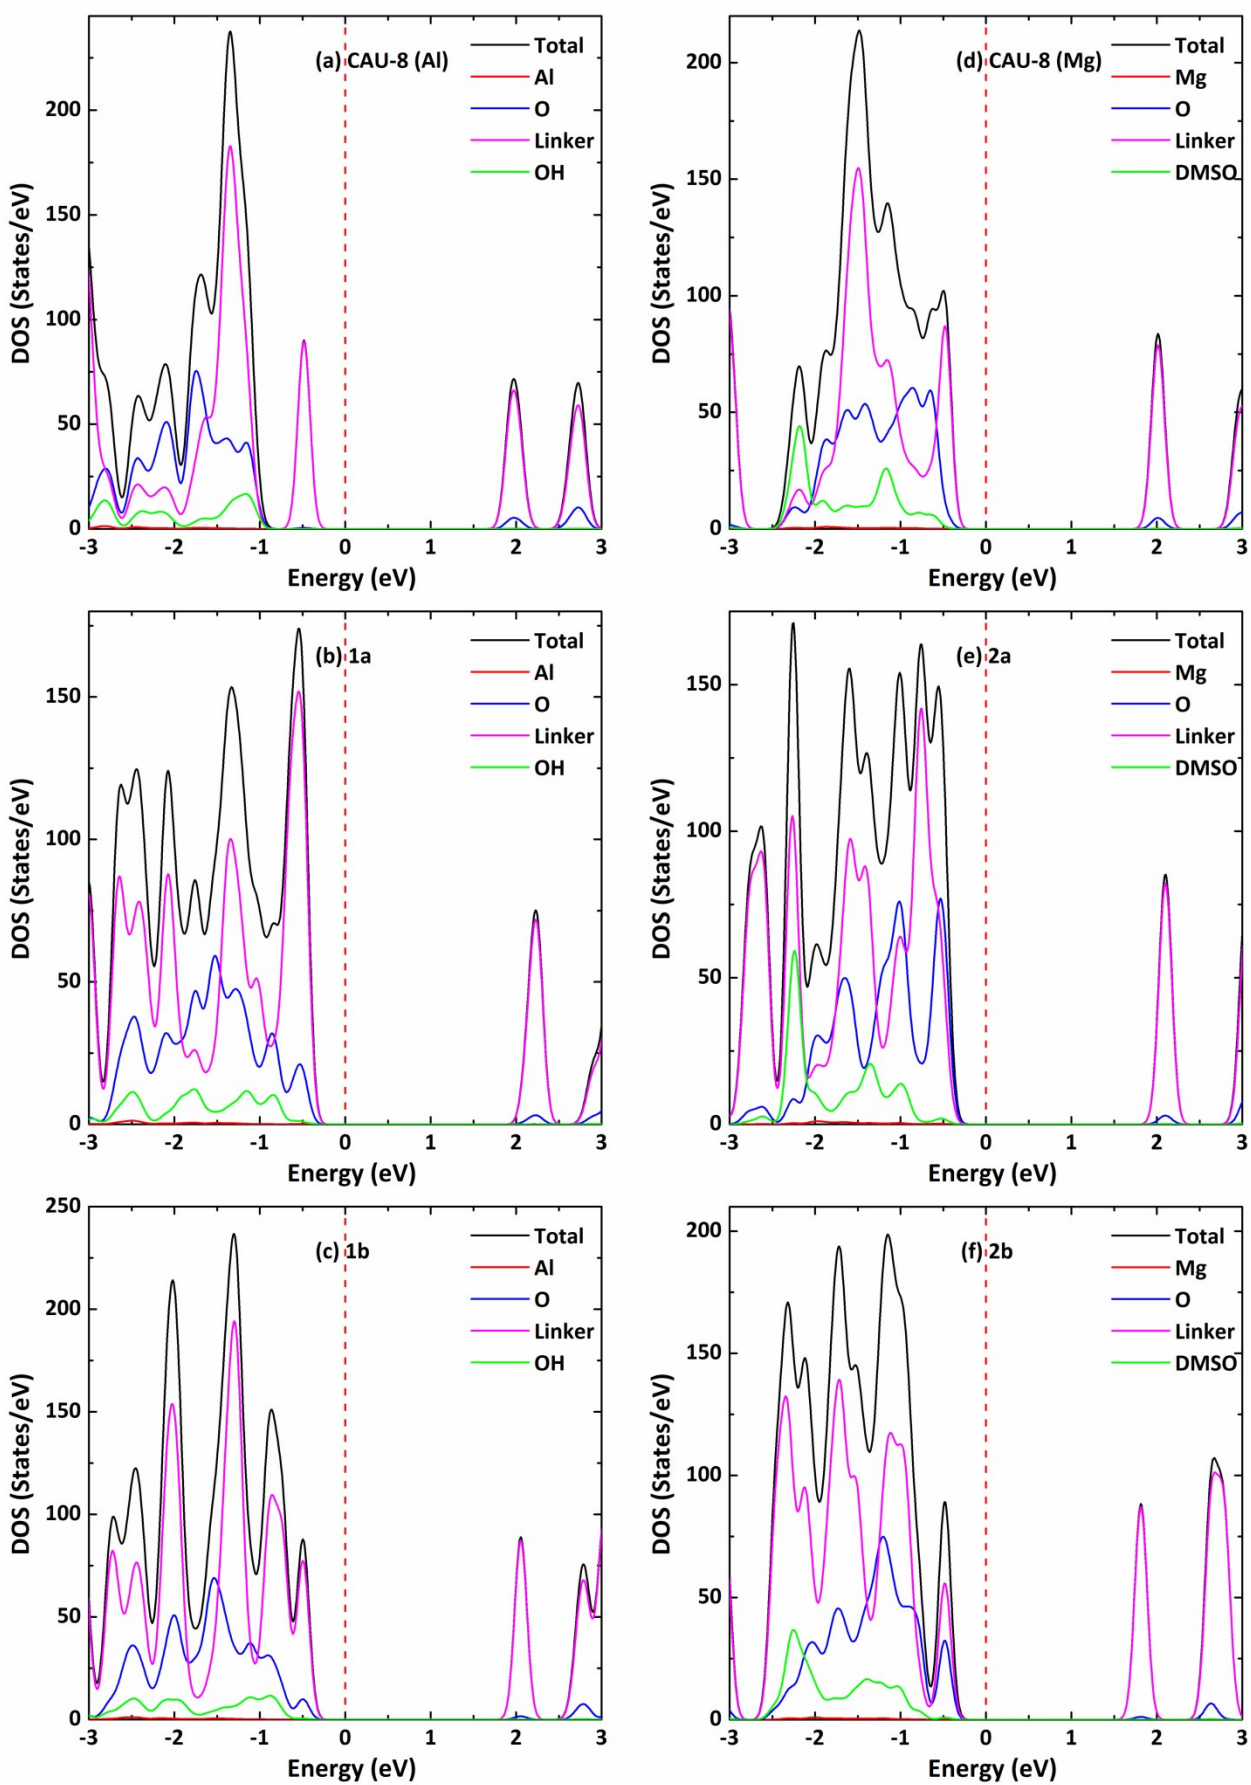

**Figure S2.** Total density of states and projected density of states for of (a) CAU-8(Al), (b) **1a**, (c) **1b**, (d) CAU-8(Mg), (e) **2a**, and (f) **2b**. Fermi level is set to zero.

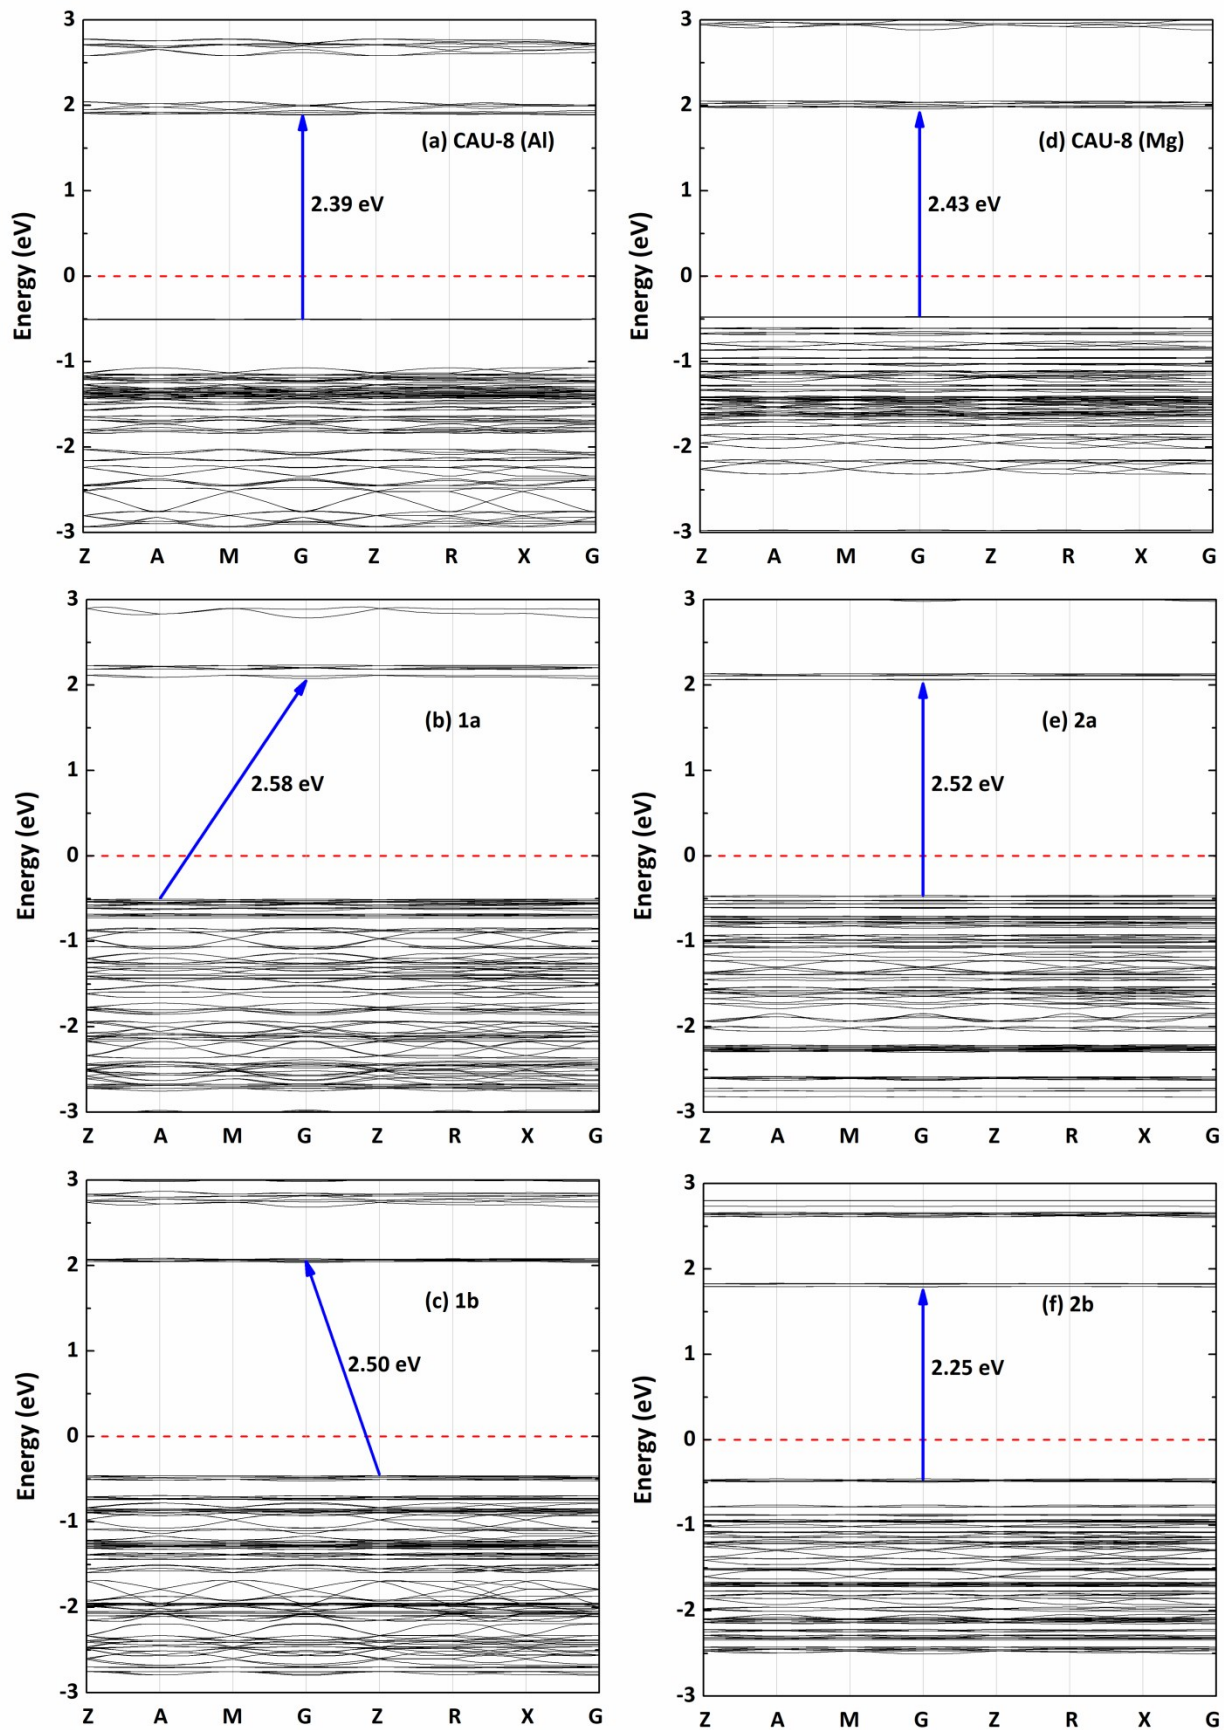

**Figure S3.** Band structures of (a) CAU-8(Al), (b) **1a**, (c) **1b**, (d) CAU-8(Mg), (e) **2a**, and (f) **2b**.

## References

- S1. N. A. Ramsahye, G. Maurin, S. Burrelly, P. L. Llewellyn, T. Loiseau, C. Serre, G. Férey, *Chem. Commun.*, 2007, **43**, 3261.
- S2. B. Chen, J. J. Potoff, and J. I. Siepmann, *J. Phys. Chem. B*, 2001, **105**, 3093.
- S3. A. Vahid and E. J. Maginn, *Phys. Chem. Chem. Phys.*, 2015, **17**, 7449.
- S4. J. M. Stubbs, J. J. Potoff, and J. I. Siepmann, *J. Phys. Chem. B*, 2004, **108**, 17596.
- S5. C. D. Wick, J. M. Stubbs, N. Rai, and J. I. Siepmann, *J. Phys. Chem. B*, 2005, **109**, 18974.
- S6. G. Kamath, F. Cao, J. J. Potoff, *J. Phys. Chem. B*, 2004, **108**, 14130.
- S7. C. D. Wick, Marcus G. Martin, and J. Ilja Siepmann, *J. Phys. Chem. B*, 2000, **104**, 33, 8008.
